# Supplementary material for: In Silico Mining of Terpenes from Red-Sea Invertebrates for SARS-CoV-2 Main Protease (Mpro) Inhibitors
Source: PubMed Central journal article supplement (PMC8038614; doi:10.3390/molecules26072082), 2021-04-05
Supplement: molecules-26-02082-s001.pdf [file molecules-26-02082-s001.pdf]

Article

# In Silico Mining of Terpenes from Red-Sea Invertebrates for SARS-CoV-2 Main Protease (M<sup>pro</sup>) Inhibitors

Mahmoud A. A. Ibrahim <sup>1,\*</sup>, Alaa H. M. Abdelrahman <sup>1</sup>, Tarik A. Mohamed <sup>2</sup>, Mohamed A. M. Atia <sup>3</sup>, Montaser A. M. Al-Hammady <sup>4</sup>, Khlood A. A. Abdeljawaad <sup>1</sup>, Eman M. Elkady <sup>4</sup>, Mahmoud F. Moustafa <sup>5,6</sup>, Faris Alrumaihi <sup>7</sup>, Khaled S. Allemailem <sup>7</sup>, Hesham R. El-Seedi <sup>8,9,10,\*</sup>, Paul W. Paré <sup>11</sup>, Thomas Efferth <sup>12</sup> and Mohamed-Elamir F. Hegazy <sup>2,12,\*</sup>

<sup>1</sup> Computational Chemistry Laboratory, Chemistry Department, Faculty of Science, Minia University, Minia 61519, Egypt; a.abdelrahman@compchem.net (A.H.M.A.); kh.abdeljawaad@compchem.net (K.A.A.A.)

<sup>2</sup> Chemistry of Medicinal Plants Department, National Research Centre, 33 El-Bohouth St., Dokki, Giza 12622, Egypt; tarik.nrc83@yahoo.com

<sup>3</sup> Molecular Genetics and Genome Mapping Laboratory, Genome Mapping Department, Agricultural Genetic Engineering Research Institute (AGERI), Agricultural Research Center (ARC), Giza 12619, Egypt; matia@ageri.sci.eg

<sup>4</sup> National Institute of Oceanography & Fisheries, NIOF, 11516 Cairo, Egypt; coralreef\_noif1@yahoo.com (M.A.M.A-H); emelkady@yahoo.com (E.M.E.).

<sup>5</sup> Department of Biology, College of Science, King Khalid University, Abha 9004, Saudi Arabia; hamdony@yahoo.com

<sup>6</sup> Department of Botany & Microbiology, Faculty of Science, South Valley University, Qena, Egypt

<sup>7</sup> Department of Medical Laboratories, College of Applied Medical Sciences, Qassim University, Buraydah, Saudi Arabia; f\_alrumaihi@qu.edu.sa (F.A.); k.allemailem@qu.edu.sa (K.S.A.)

<sup>8</sup> Department of Molecular Biosciences, The Wenner-Gren Institute, Stockholm University, S-106 91 Stockholm, Sweden; hesham.elseedi@su.se

<sup>9</sup> Department of Chemistry, Faculty of Science, El-Menoufia University, Shebin El-Kom 32512, Egypt

<sup>10</sup> International Research Center for Food Nutrition and Safety, Jiangsu University, Zhenjiang 212013, China

<sup>11</sup> Department of Chemistry & Biochemistry Texas Tech University, Lubbock, TX 79409 USA; paul.pare@ttu.edu

<sup>12</sup> Department of Pharmaceutical Biology, Institute of Pharmaceutical and Biomedical Sciences, Johannes Gutenberg University, Staudinger Weg 5, 55128 Mainz, Germany; efferth@uni-mainz.de

\* Correspondence: m.ibrahim@compchem.net (M.A.A.I.); hesham.elseedi@su.se (H.R.E.-S.); elamir77@live.com (M.E.F.H.); Tel.: +2-010-241-61-444 (M.A.A.I.); +46-73-566-8234 (H.R.E.-S.); +2-033-371-635 (M.E.F.H.)

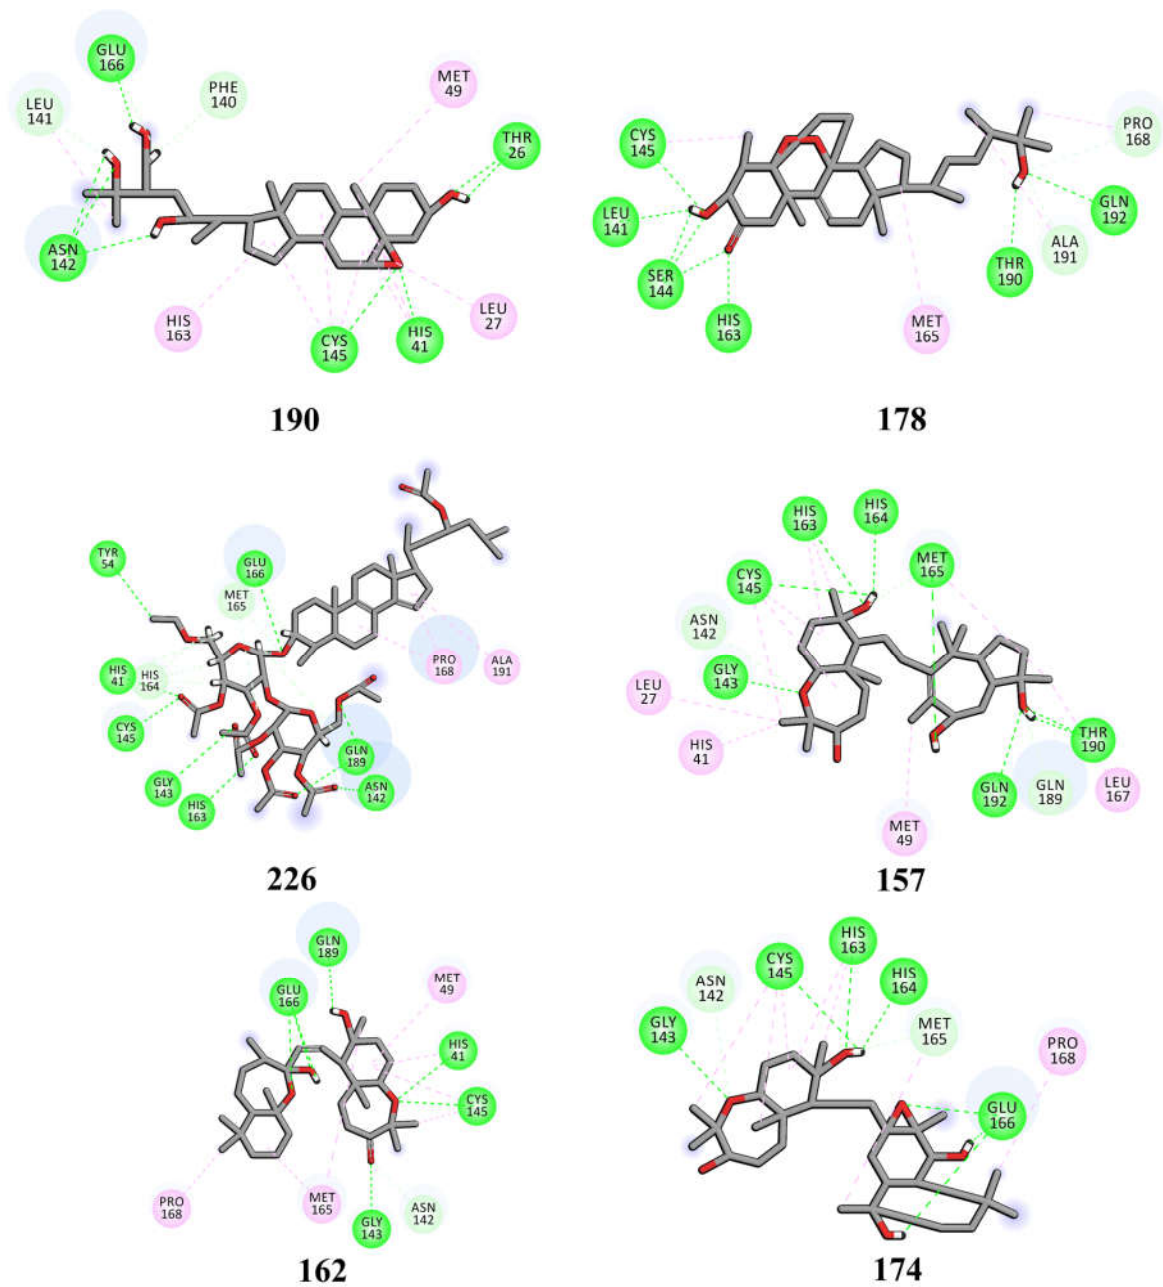

**Figure S1.** 2D representations of interactions of lopinavir and the top 27 potent marine natural products (MNPs) with the proximal amino acid residues of SARS-CoV-2 main protease ( $M^{pro}$ ).

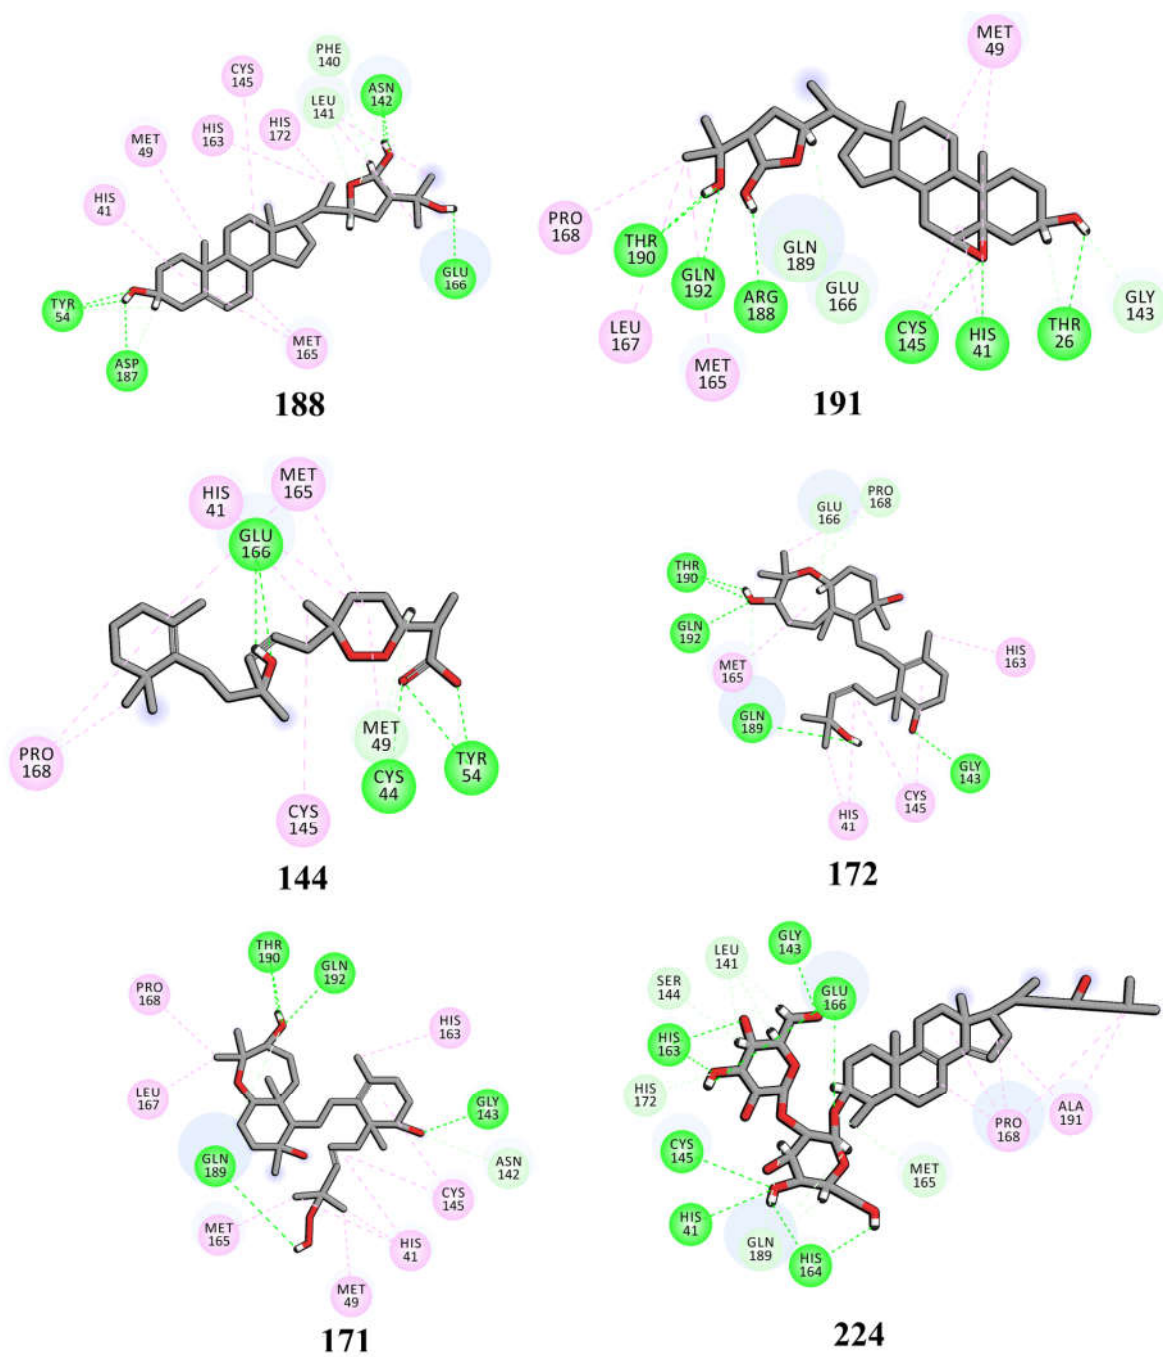

Figure S1. Continued.

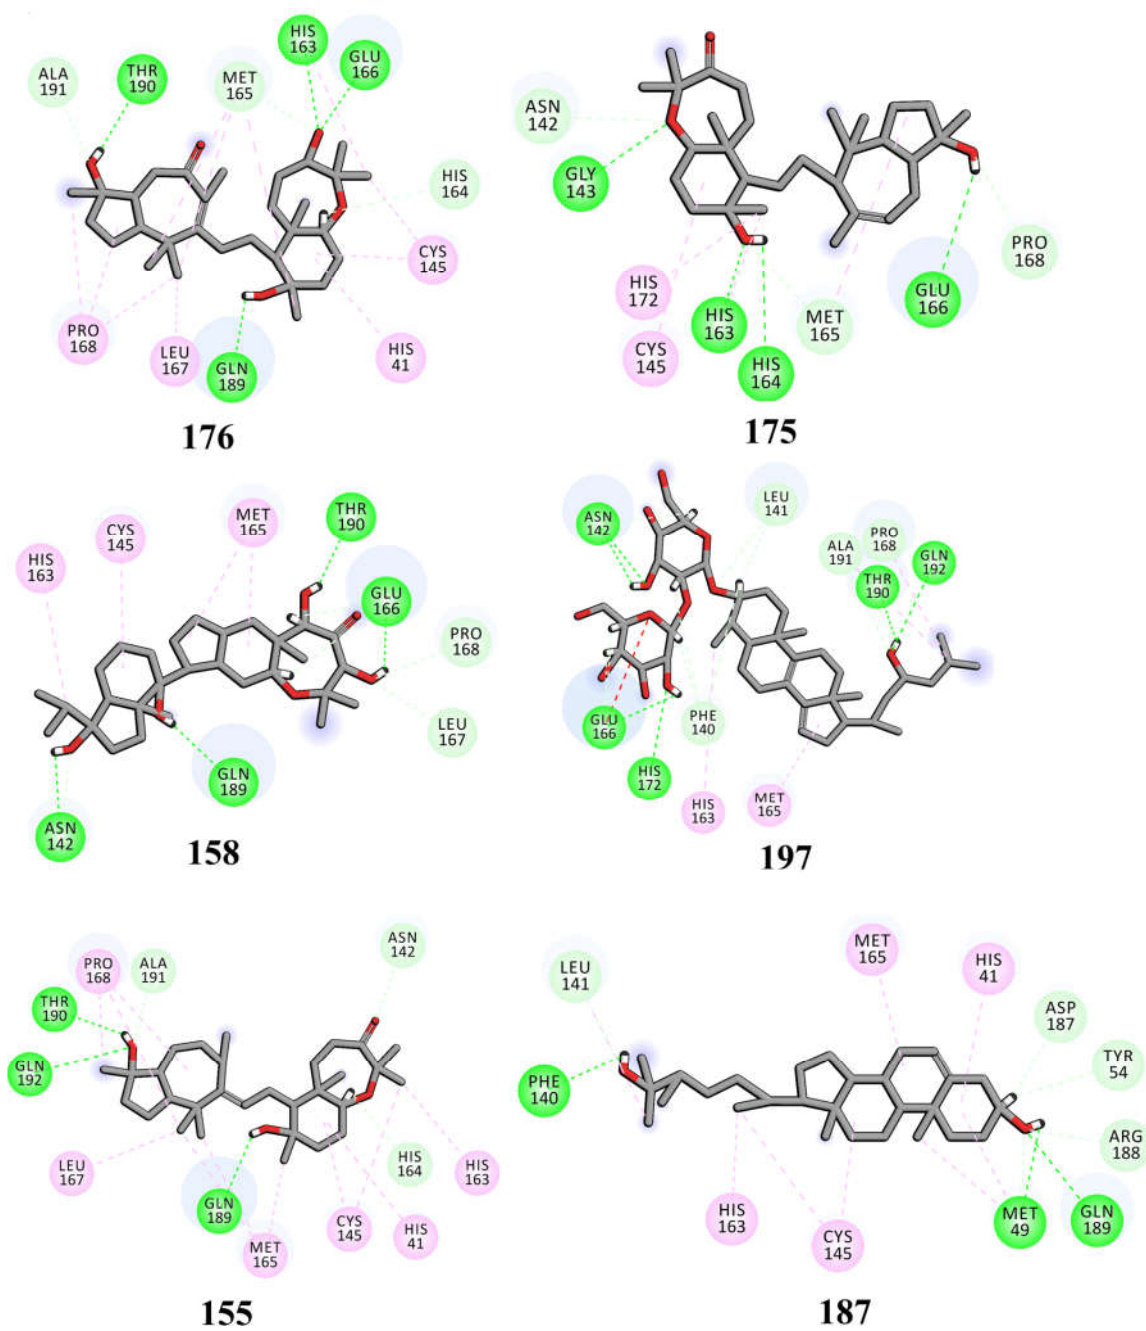

Figure S1. Continued.

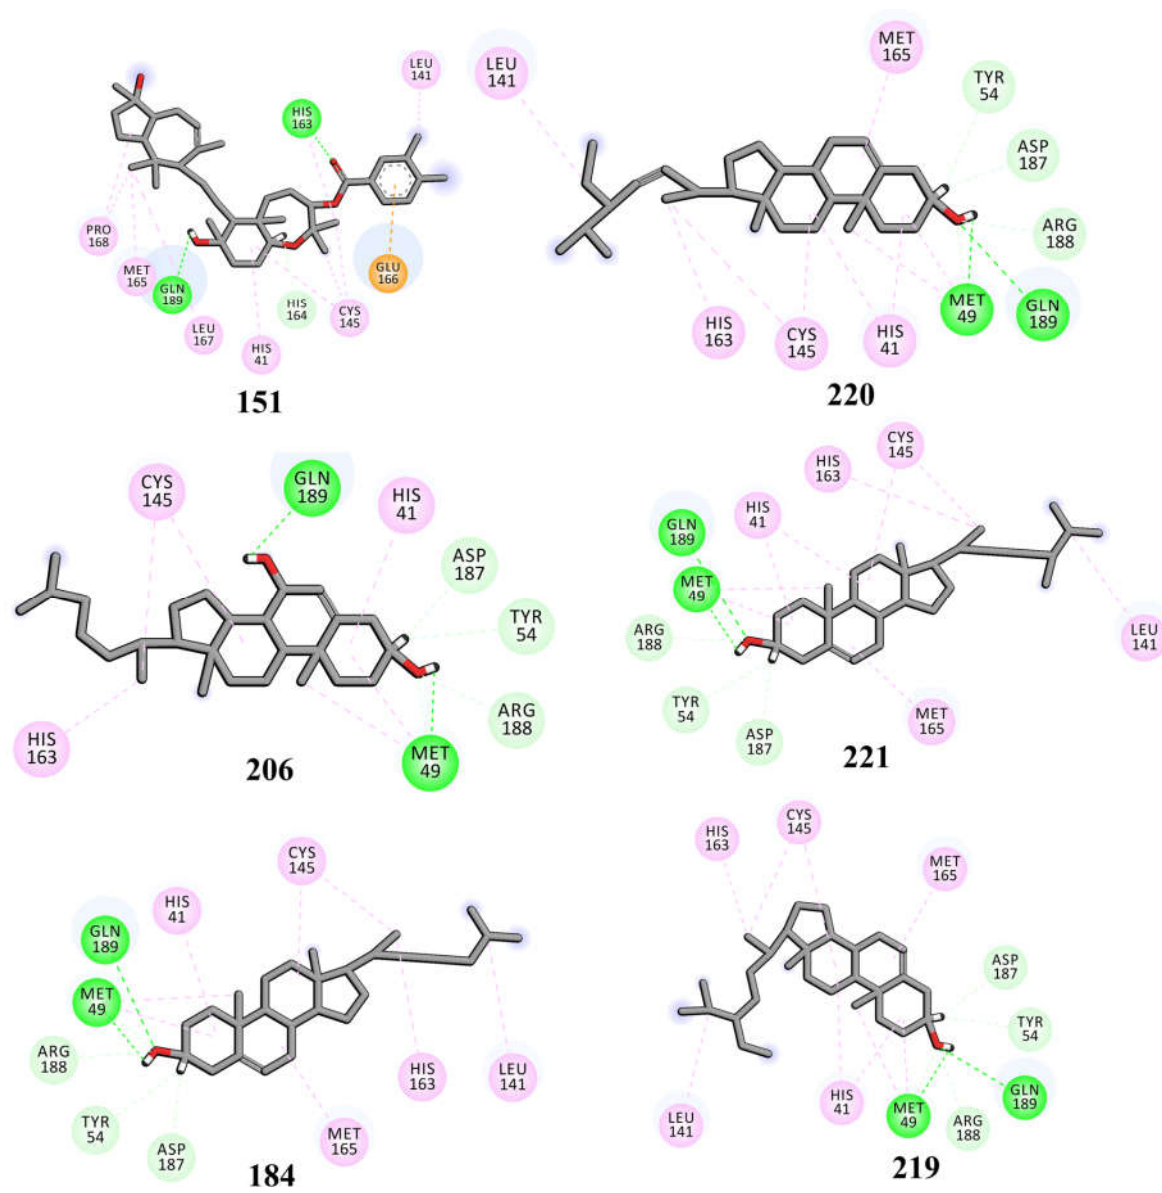

Figure S1. Continued.



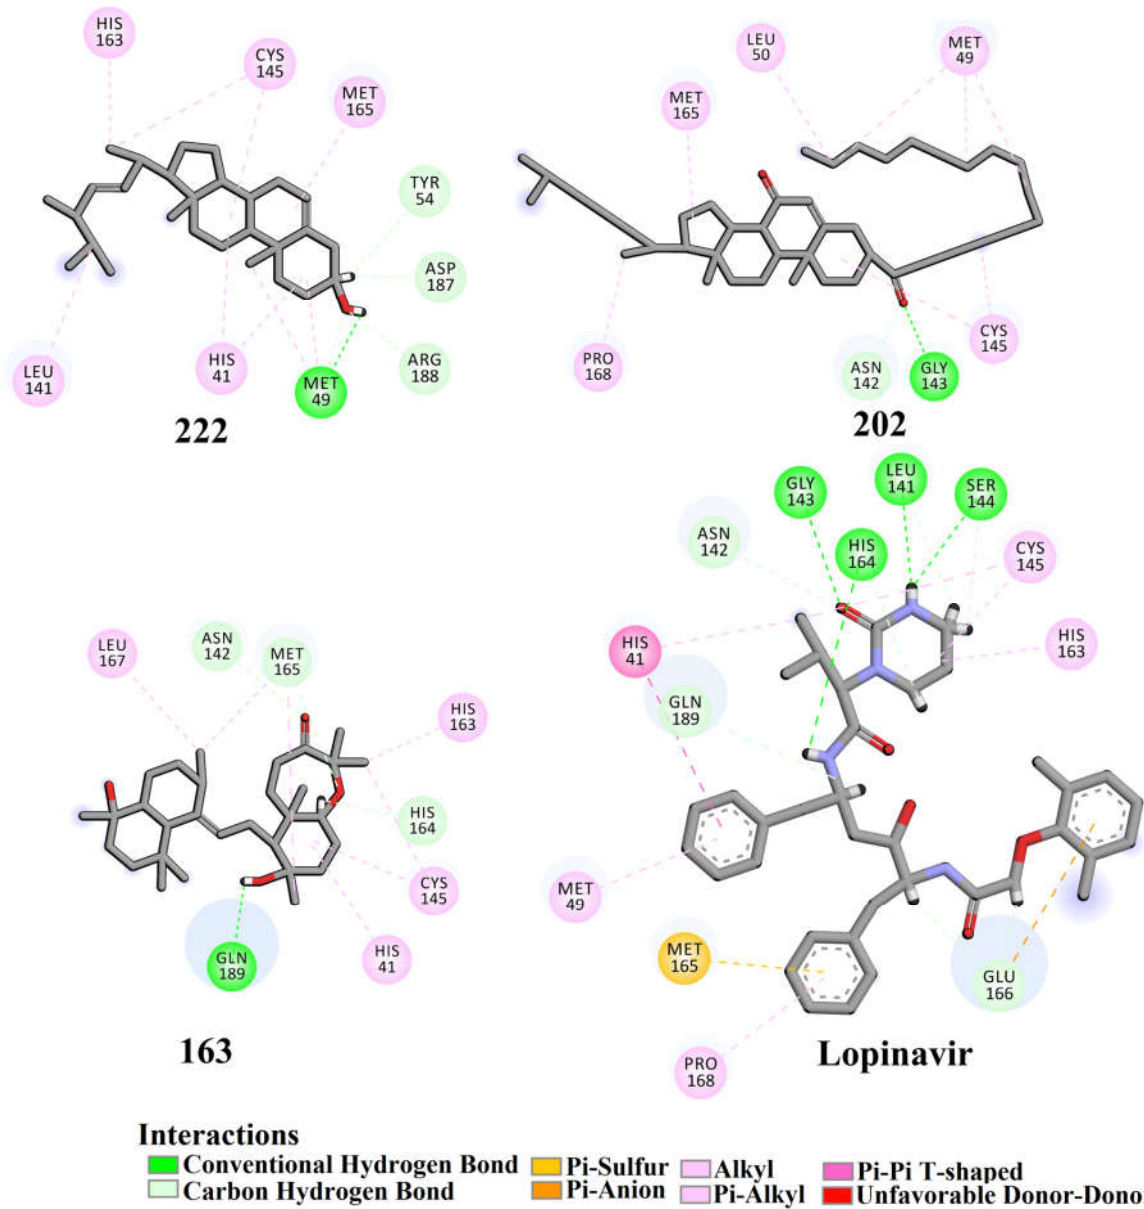

Figure S1. Continued.

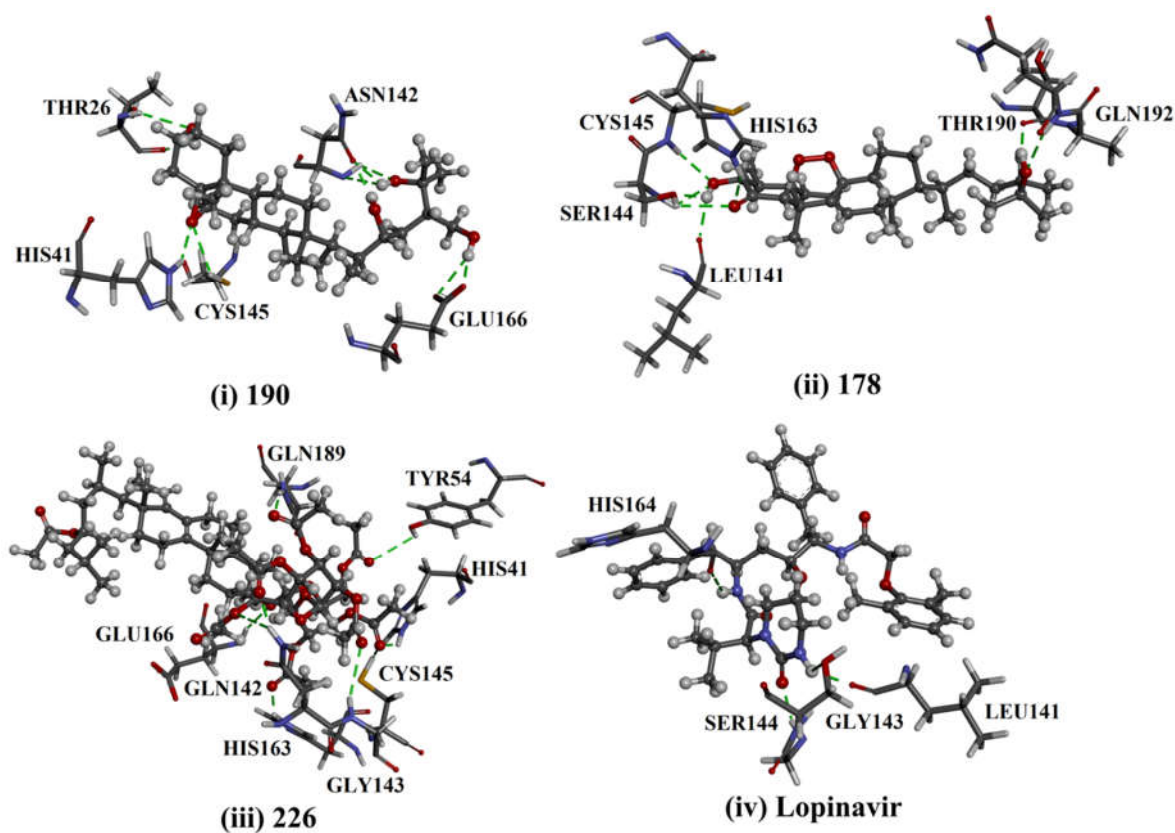

**Figure S2.** 3D representations of predicted binding modes of (i) 190, (ii) 178, (iii) 226 and (iv) lopinavir towards SARS-CoV-2 main protease ( $M^{Pro}$ ).

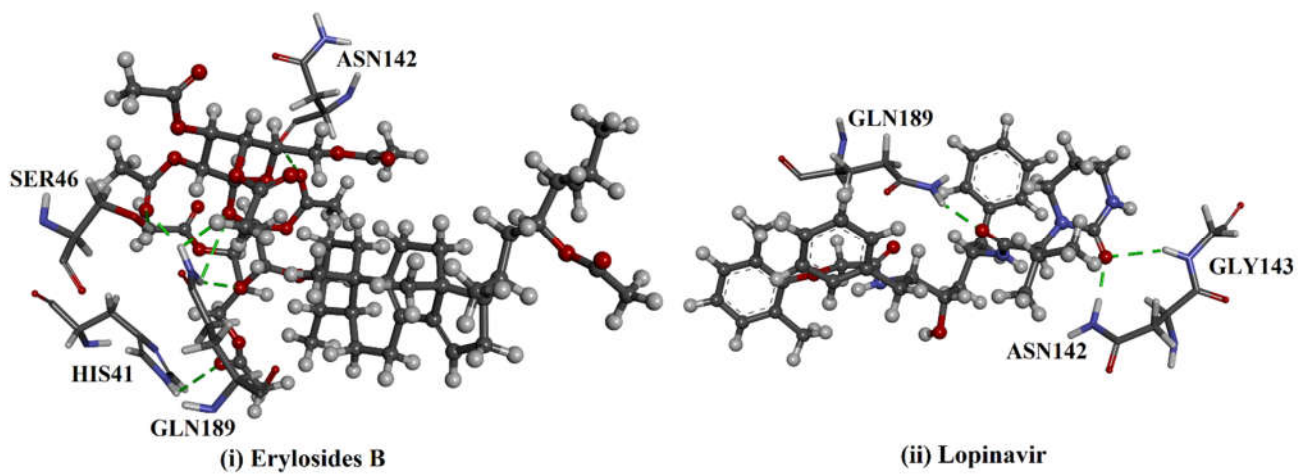

**Figure S3.** 3D representations of binding modes of (i) erylosides B (226)- and (ii) lopinavir- $M^{pro}$  complexes according to an average structure over a 100 ns MD simulation.



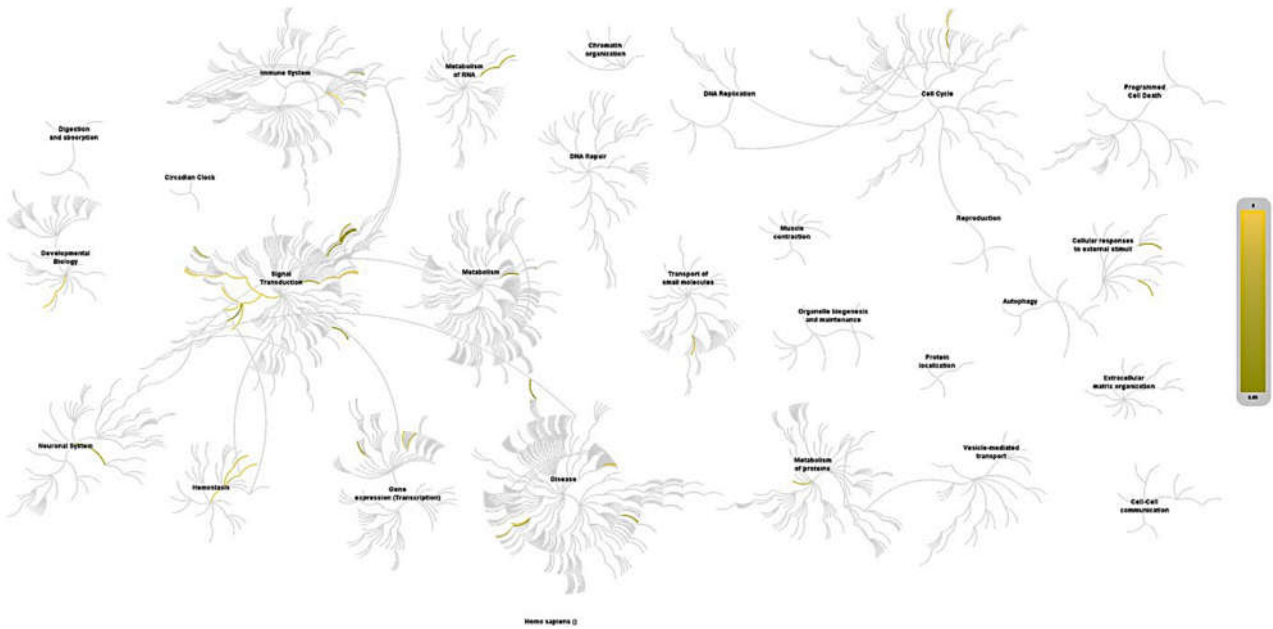

**Figure S4.** A genome-wide Reactome hierarchy map of the pathways influenced by the top 20 gene targets in response to erythrosiderin B (226) in term of SARS-CoV-2 infection. Reactome pathways are arranged in a hierarchy. Each step away from the Center represents the next level lower in the pathway hierarchy. The color code denotes the over-representation of that pathway in the input dataset. Light grey signifies pathways that are not significantly over-represented.

**Table S1.** Evaluated docking score (in kcal/mol) for lopinavir and all investigated marine natural products (MNPs) against SARS-CoV-2 main protease (M<sup>Pro</sup>).

| No. | Compound Name                                                    | Plant Source               | Chemical Structure                                                                   | Docking Score (kcal/mol) |
|-----|------------------------------------------------------------------|----------------------------|--------------------------------------------------------------------------------------|--------------------------|
| 1   | Lopinavir                                                        | ---                        | 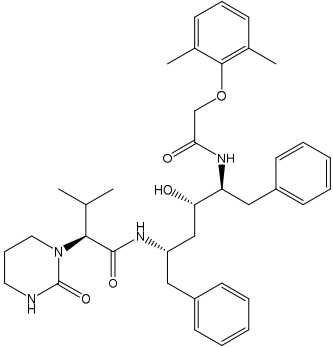   | -9.8                     |
| 2   | Depresosterol (190)                                              | <i>L. depressum</i>        |   | -12.3                    |
| 3   | 3β-25-Dihydroxy-4-methyl-5α,8α-epidioxy-2-ketoergost-9-ene (178) | <i>Simularia candidula</i> |  | -12.2                    |
| 4   | Erylosides B (226)                                               | <i>E. lendenfeldi</i>      |  | -12.1                    |
| 5   | Sipholenol H (157)                                               | <i>S. siphonella</i>       |  | -12.0                    |

|    |                                                                                  |                        |                                                                                      |       |
|----|----------------------------------------------------------------------------------|------------------------|--------------------------------------------------------------------------------------|-------|
| 6  | Dahabinone A (162)                                                               | <i>S. siphonella</i>   | 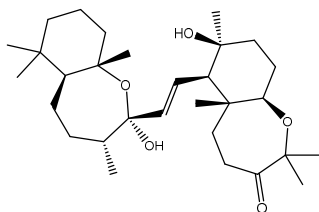   | -11.9 |
| 7  | Sipholenol I (174)                                                               | <i>S. siphonella</i>   |    | -11.8 |
| 8  | Lobophytosterol (188)                                                            | <i>L. depressum</i>    |    | -11.5 |
| 9  | (22R,24E,28E)-5β,6β-Epoxy-22,28-oxido-24-methyl-5αcholestan-3β,25,28-triol (191) | <i>L. depressum</i>    |   | -11.4 |
| 10 | Tasnemoxide A (144)                                                              | <i>D. erythraeanus</i> |  | -11.4 |
| 11 | Siphonellinol C (172)                                                            | <i>S. siphonella</i>   |  | -11.3 |

12 Siphonellinol-C-23-hydroperoxide (171)

*S. siphonella*

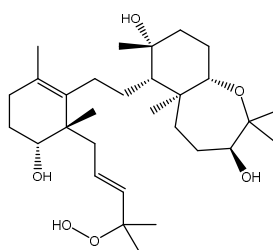

-11.2

13 Erylosides K (224)

*Erylus lendenfeldi*

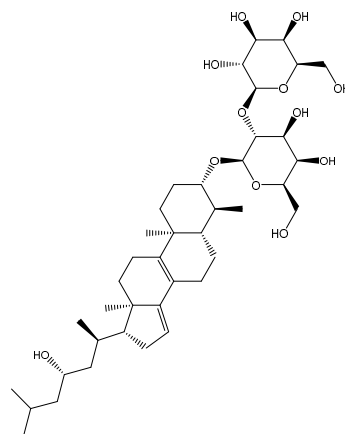

-11.1

14 Sipholenol D (176)

*S. siphonella*

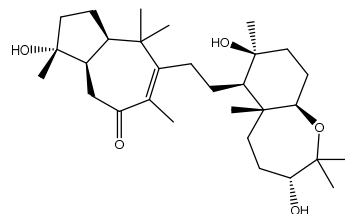

-11.0

15 Sipholenone A (175)

*S. siphonella*

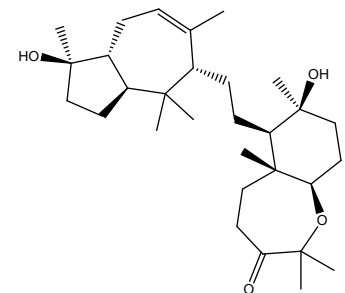

-11.0

16 Neviotine B (158)

*S. siphonella*

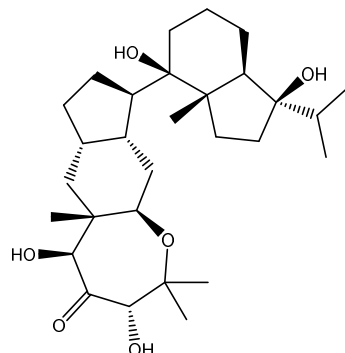

-10.9

---

|    |                                              |                       |                                                                                      |       |
|----|----------------------------------------------|-----------------------|--------------------------------------------------------------------------------------|-------|
| 17 | Eryloside A (197)                            | <i>Genus Erylus</i>   | 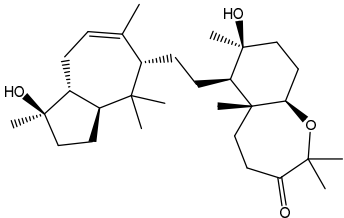   | -10.7 |
| 18 | Sipholenone D (155)                          | <i>S. siphonella</i>  |    | -10.7 |
| 19 | 24-Methylcholestane-5-en-3β,25-diol (187)    | <i>S. polydactyla</i> |    | -10.6 |
| 20 | SipholenolA-4-O-3',4'-dichlorobenzoate (151) | <i>S. siphonella</i>  |  | -10.5 |
| 21 | Stigmasterol (220)                           | <i>D. coccinea</i>    |  | -10.5 |
| 22 | Cholest-5-en-3β,7β-diol (206)                | <i>A. dichotoma</i>   |  | -10.3 |

---

---

|    |                                         |                             |                                                                                      |       |
|----|-----------------------------------------|-----------------------------|--------------------------------------------------------------------------------------|-------|
| 23 | Campesterol (221)                       | <i>D. coccinea</i>          | 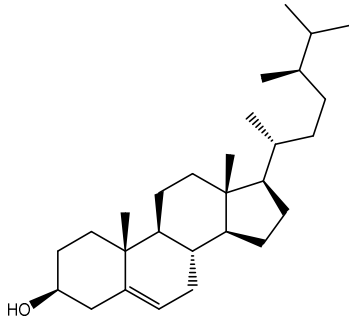   | -10.3 |
| 24 | Cholesterol (184)                       | <i>Dendronephthya</i>       |    | -10.3 |
| 25 | Clionasterol (219)                      | <i>Dragmacidon coccinea</i> |   | -10.3 |
| 26 | Brassicasterol (222)                    | <i>D. coccinea</i>          |  | -10.1 |
| 27 | 3β-Hexadecanoylcholest-5-en-7-one (202) | <i>A. dichotoma</i>         |  | -10.0 |

---



---

|    |                                                                |                      |                                                                                      |      |
|----|----------------------------------------------------------------|----------------------|--------------------------------------------------------------------------------------|------|
| 28 | Siphonone E<br>(163)                                           | <i>S. siphonella</i> | 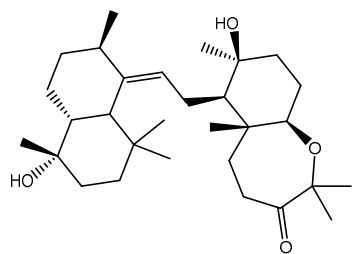   | -9.9 |
| 29 | $\beta$ -Sitosterol-3-O-(3Z)-<br>pentacosenoate (183)          | <i>E. gibbosa</i>    |    | -9.8 |
| 30 | 3 $\beta$ ,7 $\alpha$ -Dihydroxy-cholest-5-<br>ene (199)       | <i>A. dichotoma</i>  |   | -9.7 |
| 31 | Cholest-5-en-7 $\beta$ -methyl-3 $\beta$ -<br>yl formate (209) | <i>Petrosia sp.</i>  |  | -9.7 |
| 32 | Juncins A (99)                                                 | <i>J. juncea</i>     |  | -9.7 |

---

---

|    |                                            |                        |                                                                                      |      |
|----|--------------------------------------------|------------------------|--------------------------------------------------------------------------------------|------|
| 33 | Sigmosceptrellin B (138)                   | <i>D. erythraeanus</i> | 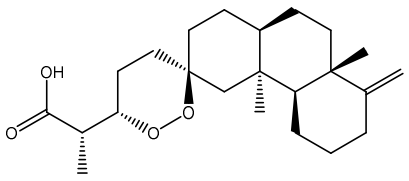   | -9.7 |
| 34 | 16-epi-Scalarolbutenolide (117)            | <i>H. erecta</i>       |    | -9.6 |
| 35 | 25-Dehydroxy-12-epi-deacetylscalarin (115) | <i>Hyrtios erecta</i>  |    | -9.6 |
| 36 | 7-Dehydrocholesterol (211)                 | <i>Petrosia sp.</i>    |   | -9.6 |
| 37 | Dendronesterone A (185)                    | <i>Dendronephthya</i>  |  | -9.5 |
| 38 | Salmahyrtisol B (121)                      | <i>H. erecta</i>       |  | -9.5 |

---

---

|    |                                       |                               |                                                                                      |      |
|----|---------------------------------------|-------------------------------|--------------------------------------------------------------------------------------|------|
| 39 | Sipholenol G (154)                    | <i>S. siphonella</i>          | 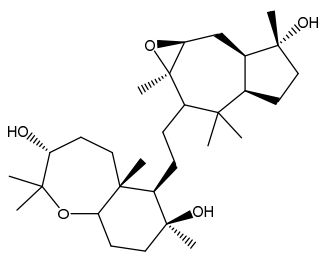   | -9.5 |
| 40 | Sigmosceptrellin B methyl ester (139) | <i>D. erythraeanus</i>        |    | -9.5 |
| 41 | 3β-Hydroxycholest-5-en-7-one (205)    | <i>A. dichotoma</i>           |    | -9.5 |
| 42 | Nuapapuin A methyl ester (132)        | <i>Diacarnus erythraeanus</i> |   | -9.4 |
| 43 | Sipholenol A (150)                    | <i>S. siphonella</i>          |  | -9.4 |
| 44 | Siphonellinol E (170)                 | <i>S. siphonella</i>          |  | -9.4 |

---

45 Sipholenol F (156) *S. siphonella*

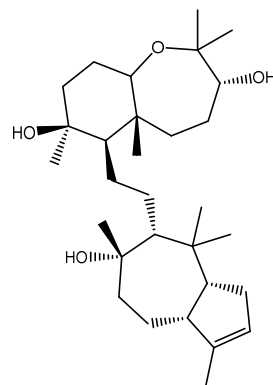

-9.4

46 Sipholenol L (164) *S. siphonella*

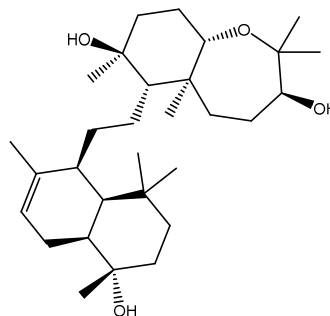

-9.4

47 Norrisolide (110) *Dysidea sp.*

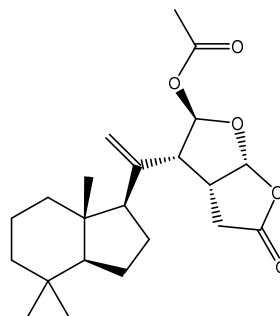

-9.3

48 12-O-Deacetyl-12-epi-scalarine (126) *H. erecta*

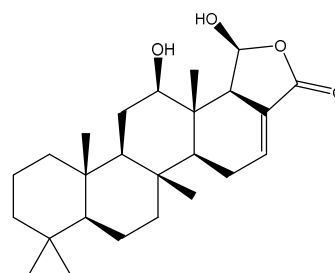

-9.3

49 Sinularolide C diacetate (62) *L. crassum*

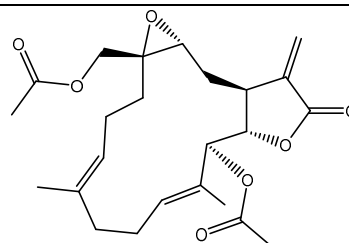

-9.3

---

|    |                                                                  |                        |                                                                                      |      |
|----|------------------------------------------------------------------|------------------------|--------------------------------------------------------------------------------------|------|
| 50 | (+)-Wistarin (128)                                               | <i>I. wistarii</i>     | 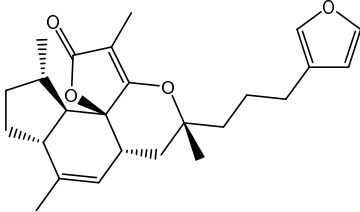   | -9.3 |
| 51 | epi-Sipholenol (173)                                             | <i>S. siphonella</i>   |    | -9.3 |
| 52 | Scalarolide (123)                                                | <i>H. erecta</i>       |    | -9.2 |
| 53 | (-)-Muqubilin A (136)                                            | <i>D. erythraeanus</i> |  | -9.2 |
| 54 | Sesterstatin (116)                                               | <i>H. erecta</i>       |  | -9.2 |
| 55 | Cholesta-8-en-3 $\beta$ ,5 $\alpha$ ,6 $\alpha$ ,25-tetrol (214) | <i>Lamellodysidea</i>  |  | -9.1 |

---

56 7 $\beta$ -Acetoxy-24-methylcholesta-5-24(28)-diene-3,19-diol (194)

*L. arboreum*

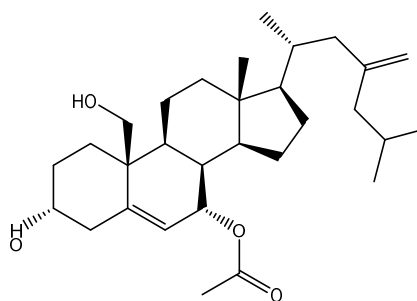

-9.1

57 Sipholenol J (165)

*S. siphonella*

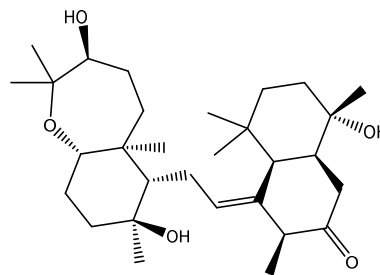

-9.1

58 Cholesta-8,24-dien-3 $\beta$ ,5 $\alpha$ ,6 $\alpha$ -triol (216)

*L. herbacea*

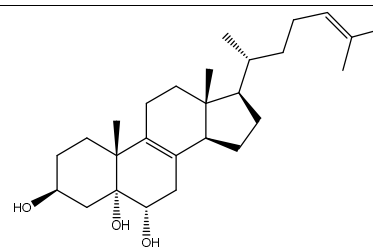

-9.0

59 Pachycladin A (83)

*Cladiella pachyclados*

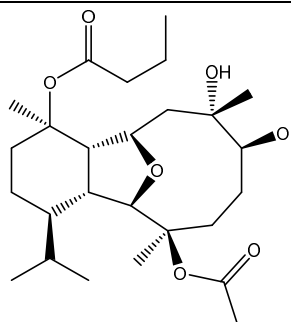

-9.0

60 16-Hydroxyscalarolide (125)

*H. erecta*

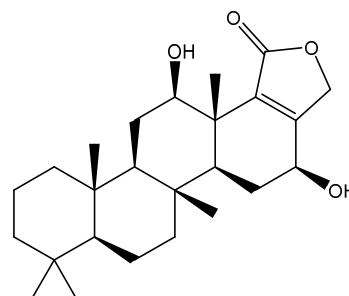

-9.0



|    |                                                                                                   |                                   |                                                                                      |      |
|----|---------------------------------------------------------------------------------------------------|-----------------------------------|--------------------------------------------------------------------------------------|------|
| 61 | (-)-9,10-Epoxymuqubilin A<br>(135)                                                                | <i>D. erythraeanus</i>            | 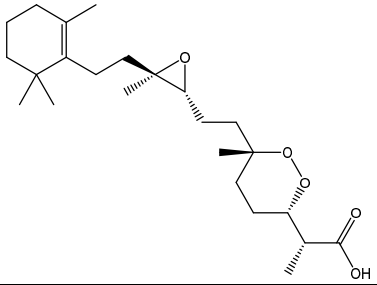   | -9.0 |
| 62 | Steroid                                                                                           | <i>Cystoseira trinode</i>         |    | -8.9 |
| 63 | (22E,24S)-5 $\alpha$ ,8 $\alpha$ -Epidioxy-24<br>methylcholesta-6,22-dien-<br>3 $\beta$ -ol (200) | <i>A. dichotoma</i>               |   | -8.9 |
| 64 | 5 $\alpha$ -Pregna-3 $\beta$ -acetoxy-<br>12 $\beta$ ,16 $\beta$ -diol-20-one (182)               | <i>Echinocalthria<br/>gibbosa</i> |  | -8.9 |
| 65 | Hyrtsiosal (120)                                                                                  | <i>H. erecta</i>                  |  | -8.9 |
| 66 | (-)-13,14-Epoxymuqubilin A<br>(134)                                                               | <i>D. erythraeanus</i>            |  | -8.9 |

|    |                                                                                                            |                              |                                                                                      |      |
|----|------------------------------------------------------------------------------------------------------------|------------------------------|--------------------------------------------------------------------------------------|------|
| 67 | 24-Methylcholestane-3 $\beta$ ,5 $\alpha$ ,6 $\beta$ ,25-tetrol-25-monoacetate ( <b>186</b> )              | <i>Sinularia polydactyla</i> | 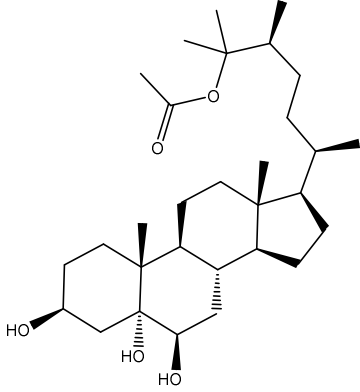   | -8.9 |
| 68 | 7 $\beta$ -Chloro-8 $\alpha$ -hydroxy-12-acetoxy-deepoxysarcophine ( <b>49</b> )                           | <i>S. ehrenbergi</i>         |    | -8.9 |
| 69 | (22E,24S)-5 $\alpha$ ,8 $\alpha$ -Epidioxy-24-methylcholesta-6,9(11),22-trien-3 $\beta$ -ol ( <b>201</b> ) | <i>A. dichotoma</i>          |   | -8.9 |
| 70 | 3-Acetylsesterstatin ( <b>118</b> )                                                                        | <i>H. erecta</i>             |  | -8.9 |
| 71 | 19-Acetyl sesterstatin ( <b>122</b> )                                                                      | <i>H. erecta</i>             |  | -8.9 |

---

|    |                                              |                                  |                                                                                      |      |
|----|----------------------------------------------|----------------------------------|--------------------------------------------------------------------------------------|------|
| 72 | Dendrotriol (223)                            | <i>Dendronephthya</i>            | 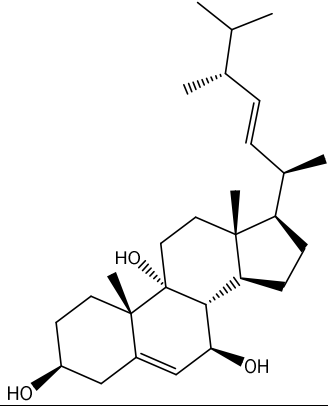   | -8.8 |
| 73 | Neviotine-A (149)                            | <i>Siphonochalina siphonella</i> |    | -8.8 |
| 74 | 24-Methylcholesta-5,24(28)-diene-3β-ol (193) | <i>Litophyton arboreum</i>       |   | -8.8 |
| 75 | (-)-Ircinianin (129)                         | <i>I. wistarii</i>               |  | -8.8 |
| 76 | Sipholenol M (168)                           | <i>S. siphonella</i>             |  | -8.8 |
| 77 | 3β,7β,9α-Trihydroxycholest-5-en (208)        | <i>Petrosia</i>                  |  | -8.8 |

---

|    |                                                                                                                                |                              |                                                                                      |      |
|----|--------------------------------------------------------------------------------------------------------------------------------|------------------------------|--------------------------------------------------------------------------------------|------|
| 78 | Siphonellinol B (161)                                                                                                          | <i>S. siphonella</i>         | 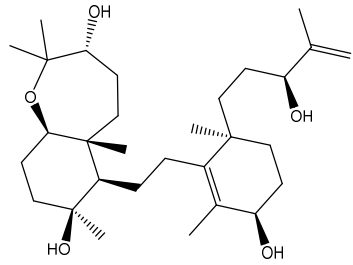   | -8.8 |
| 79 | 1-hydroxy-1,4,4,6-tetramethyl-1,2,3,3a,4,5,8,8a-octahydroazulen-5-yl)-ethyl)-4a,6-dimethyloctahydro-2H-chromene-2,6-diol (166) | <i>S. siphonella</i>         |    | -8.8 |
| 80 | 5 $\alpha$ ,8 $\alpha$ -Epidioxycholesta-6-en-3 $\beta$ -ol (213)                                                              | <i>Petrosia sp.</i>          |    | -8.8 |
| 81 | (-)-Wistarin (127)                                                                                                             | <i>Ircinia wistarii</i>      |   | -8.7 |
| 82 | Norsesterterpene                                                                                                               | <i>Pocillopora verrucosa</i> |  | -8.7 |
| 83 | 5 $\beta$ ,6 $\beta$ -Epoxy-24E-methylchoestan-3 $\beta$ ,22(R),25-triol (189)                                                 | <i>L. depressum</i>          |  | -8.7 |

84 22-Dehydrocholesterol (207)

*A. dichotoma*

-8.7

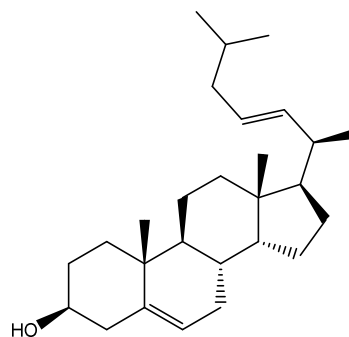85 24-Methylcholesta-5,24(28)-diene-3 $\beta$ ,7 $\beta$ ,19-triol (195)*L. arboreum*

-8.7

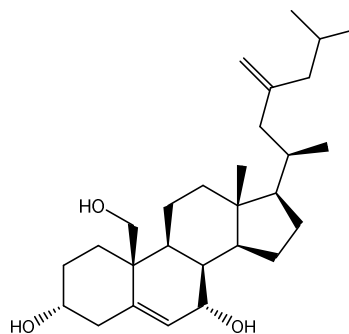

86 Labolide (58)

*L. crassum*

-8.7

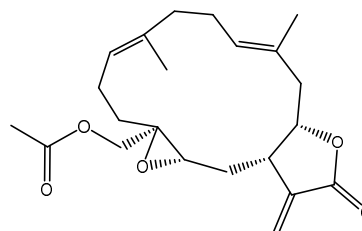

87 Hyrtiosterol (196)

*Hyrtios Species*

-8.6

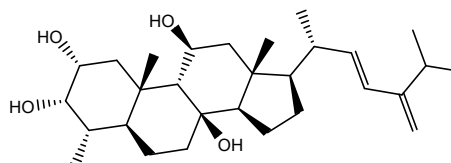88 Cholesta-8(14)-en-3 $\beta$ ,5 $\alpha$ ,6 $\alpha$ ,25-tetrol (215)*L. herbacea*

-8.6

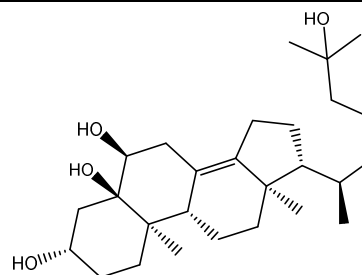

---

|    |                                                                                  |                         |                                                                                      |      |
|----|----------------------------------------------------------------------------------|-------------------------|--------------------------------------------------------------------------------------|------|
| 89 | Bilospens A (130)                                                                | <i>Dysidea cinerea</i>  | 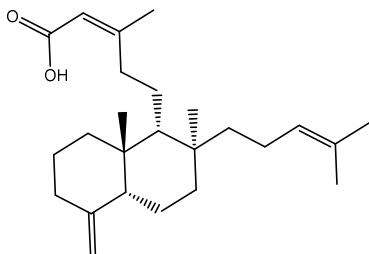   | -8.6 |
| 90 | Salmahyrtisol C (124)                                                            | <i>H. erecta</i>        |    | -8.6 |
| 91 | 5 $\alpha$ ,6 $\alpha$ -Epoxycholest-8(14)-ene-3 $\beta$ ,7 $\alpha$ -diol (212) | <i>Petrosia sp.</i>     |   | -8.6 |
| 92 | Cholesta-8(14),24-dien-3 $\beta$ ,5 $\alpha$ ,6 $\alpha$ -triol (217)            | <i>L. herbacea</i>      |  | -8.6 |
| 93 | xeniolide                                                                        | <i>Acropora humilis</i> |  | -8.6 |
| 94 | Seco-norrlandin B (112)                                                          | <i>Dysidea sp.</i>      |  | -8.5 |

---



---

|     |                                                 |                              |                                                                                                                                                                                                     |      |
|-----|-------------------------------------------------|------------------------------|-----------------------------------------------------------------------------------------------------------------------------------------------------------------------------------------------------|------|
| 95  | 3 $\beta$ -Hexadecanoylcholest-5-en-7-one (202) | <i>A. dichotoma</i>          | The structure shows a steroid nucleus with a long hexadecanoyl chain at C-3, a double bond at C-5, and a ketone at C-7. It also has methyl groups at C-10 and C-13, and an isopropyl group at C-14. | -8.5 |
| 96  | Sesterterpene                                   | <i>Pocillopora verrucosa</i> | A complex polycyclic sesterterpene with multiple fused rings, including a five-membered ring with an oxygen atom, and various methyl and acetyl substituents.                                       | -8.5 |
| 97  | Tasnemoxide B (145)                             | <i>D. erythraeanus</i>       | A complex molecule featuring a bicyclic core, a long chain with a terminal vinyl group, a hydroxyl group, and a carboxylic acid group.                                                              | -8.5 |
| 98  | Klysimplexin G (84)                             | <i>C. pachyclados</i>        | A complex polycyclic structure with multiple fused rings, including a seven-membered ring with an oxygen atom, and several hydroxyl and acetyl groups.                                              | -8.5 |
| 99  | Erylosides K (224)                              | <i>Erylus lendenfeldi</i>    | A complex molecule consisting of a steroid-like core linked to a sugar moiety, with multiple hydroxyl groups and a long chain with a terminal hydroxyl group.                                       | -8.5 |
| 100 | (+)-Polyanthelin A (96)                         | <i>C. pachyclados</i>        | A complex polycyclic structure with multiple fused rings, including a seven-membered ring with an oxygen atom, and several methyl and acetyl groups.                                                | -8.5 |

---

101 Gorgosten-5(E)-3 $\beta$ -ol (179)*Heteroxenia ghardaqensis*

-8.5

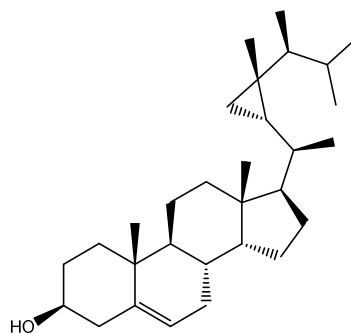

102 Salmahyrtisol A (119)

*H. erecta*

-8.4

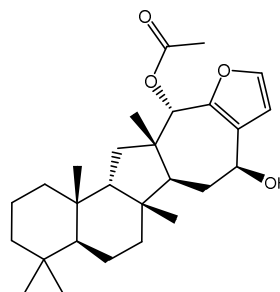103 3 $\beta$ -Hexadecanoylcholest-5-en-7 $\beta$ -ol (203)*A. dichotoma*

-8.4

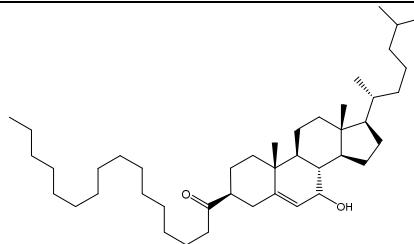

104 Hurghaperoxide (137)

*D. erythraeanus*

-8.4

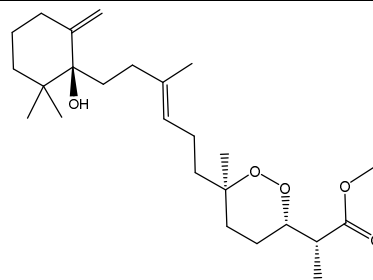

105 Dehydroepiandrosterone (210)

*Petrosia sp.*

-8.4

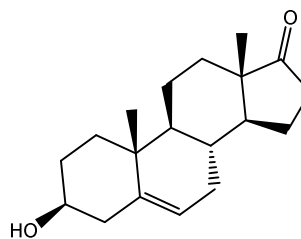

---

|     |                                                                      |                           |                                                                                      |      |
|-----|----------------------------------------------------------------------|---------------------------|--------------------------------------------------------------------------------------|------|
| 106 | (22R,24E)-24-Methylcholest-5-en-3 $\beta$ ,22,25,28-tetraol<br>(192) | <i>L. depressum</i>       | 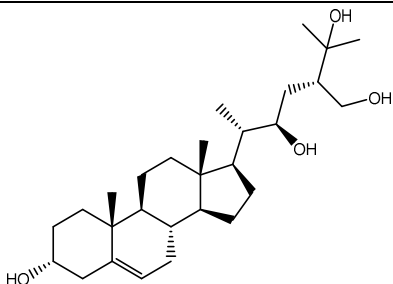   | -8.4 |
| 107 | Trochelioid A (36)                                                   | <i>S. trocheliophorum</i> |    | -8.4 |
| 108 | Klysimplexin E (86)                                                  | <i>C. pachyclados</i>     |   | -8.4 |
| 109 | Xenialactol-C (75)                                                   | <i>X. obscuronata</i>     |  | -8.4 |
| 110 | 7-Keto-8 $\alpha$ -hydroxy-deepoxysarcophine (48)                    | <i>S. ehrenbergi</i>      |  | -8.4 |

---

|     |                                |                       |                                                                                      |      |
|-----|--------------------------------|-----------------------|--------------------------------------------------------------------------------------|------|
| 111 | Erylosides B (226)             | <i>E. lendenfeldi</i> | 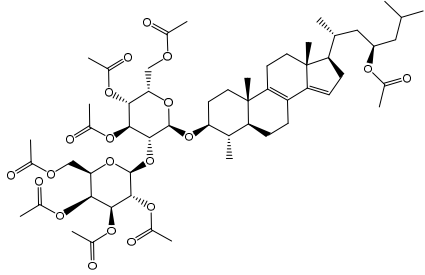   | -8.3 |
| 112 | Sipholenoside A (159)          | <i>S. siphonella</i>  |    | -8.3 |
| 113 | Sipholenoside B (160)          | <i>S. siphonella</i>  |    | -8.3 |
| 114 | Thunbergol (57)                | <i>L. pauciflorum</i> |   | -8.3 |
| 115 | 14(15)-Epoxyxeniaphyllene (77) | <i>X. lilielae</i>    |  | -8.2 |
| 116 | Bilospens A (131)              | <i>D. cinerea</i>     |  | -8.2 |

117 Tasnemoxide C (**146**) *D. erythraeanus*

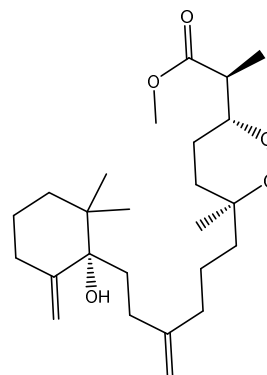

-8.2

118 Gorgostan-3 $\beta$ ,5 $\alpha$ ,6 $\beta$ -triol-11 $\alpha$ -acetate (**181**) *H. ghardaqensis*

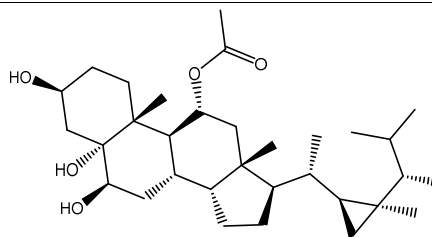

-8.2

119 Cembrane *Nephtea molle*

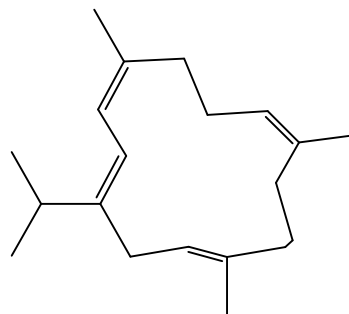

-8.2

120 Muqubilone (**148**) *D. erythraeanus*

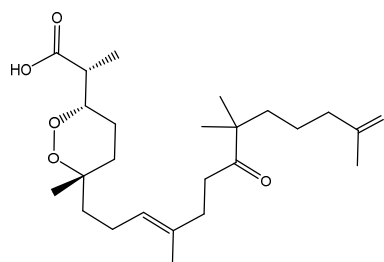

-8.2

121 Peyssonol A (**17**) *Peyssonmelia* sp.

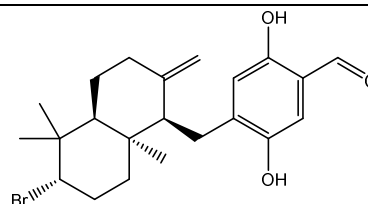

-8.1

|     |                                                                                         |                                  |                                                                                      |      |
|-----|-----------------------------------------------------------------------------------------|----------------------------------|--------------------------------------------------------------------------------------|------|
| 122 | 14,15-Xeniaphyllandiol-4,5-epoxide ( <b>81</b> )                                        | <i>X. macrosoiculata</i>         | 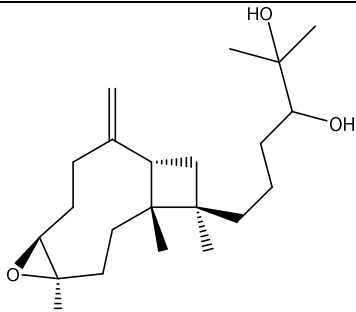   | -8.1 |
| 123 | Methyl-2-epinuapapuanate ( <b>133</b> )                                                 | <i>D. erythraeanus</i>           |    | -8.1 |
| 124 | 6'-Hydroxy4'-methoxyavarone ( <b>23</b> )                                               | <i>D. cinerea</i>                |   | -8.1 |
| 125 | (22E)-Methylcholesta-5,22-diene-1 $\alpha$ ,3 $\beta$ ,7 $\alpha$ -triol ( <b>198</b> ) | <i>Antipathes dichotoma</i>      |  | -8.1 |
| 126 | Neviotine-C ( <b>177</b> )                                                              | <i>Siphonochalina siphonella</i> |  | -8.0 |
| 127 | Sipholenol K ( <b>167</b> )                                                             | <i>S. siphonella</i>             |  | -8.0 |

|     |                            |                                               |                                                                                      |      |
|-----|----------------------------|-----------------------------------------------|--------------------------------------------------------------------------------------|------|
| 128 | Trochelioid B (37)         | <i>S. trocheliophorum</i>                     | 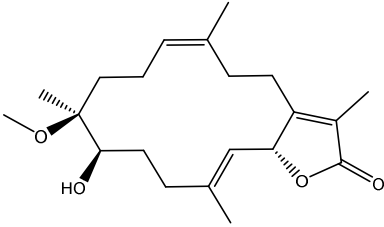   | -8.0 |
| 129 | Xeniolide-E (76)           | <i>X. obscuronata</i>                         |    | -8.0 |
| 130 | Epoxyxeniaphyllenol-A (80) | <i>X. lilielae</i> , <i>X. macrosoiculata</i> |   | -7.9 |
| 131 | Xeniaphyllenol-B (82)      | <i>X. macrosoiculata</i>                      |  | -7.9 |
| 132 | Chelodane (107)            | <i>Chelonaplysilla erecta</i>                 |  | -7.9 |
| 133 | Aikupikoxide B (143)       | <i>D. erythraeanus</i>                        |  | -7.9 |

---

|     |                                         |                             |                                                                                      |      |
|-----|-----------------------------------------|-----------------------------|--------------------------------------------------------------------------------------|------|
| 134 | Eryloside A (197)                       | <i>Genus Erylus</i>         | 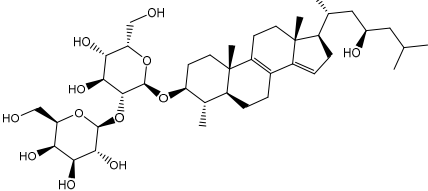   | -7.9 |
| 135 | 3-Deoxy-20-acetylpresinularolide B (64) | <i>L. crassum</i>           |    | -7.9 |
| 136 | Sarcophine (30)                         | <i>S. glaucum</i>           |   | -7.9 |
| 137 | Xenicin (73)                            | <i>Xenia macrosoiculata</i> |  | -7.8 |
| 138 | Sarcophytol M (65)                      | <i>Litophyton arboreum</i>  |  | -7.8 |
| 139 | Smenotronic acid (26)                   | <i>Smenospongia sp.</i>     |  | -7.8 |

---



|     |                                          |                        |                                                                                      |      |
|-----|------------------------------------------|------------------------|--------------------------------------------------------------------------------------|------|
| 140 | Zaatirin (109)                           | <i>C. erecta</i>       | 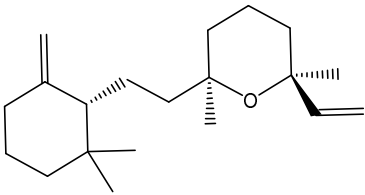   | -7.8 |
| 141 | Cholest-5-en-3 $\beta$ -yl-formate (204) | <i>A. dichotoma</i>    |    | -7.8 |
| 142 | Pachycladin B (85)                       | <i>C. pachyclados</i>  |    | -7.8 |
| 143 | Sclerophytin A (93)                      | <i>C. pachyclados</i>  |  | -7.8 |
| 144 | epi-Sigmosceptrellin B (147)             | <i>D. erythraeanus</i> |  | -7.8 |
| 145 | Pachycladin D (91)                       | <i>C. pachyclados</i>  |  | -7.7 |

|     |                                                             |                         |                                                                                      |      |
|-----|-------------------------------------------------------------|-------------------------|--------------------------------------------------------------------------------------|------|
| 146 | Barekoxide (108)                                            | <i>C. erecta</i>        | 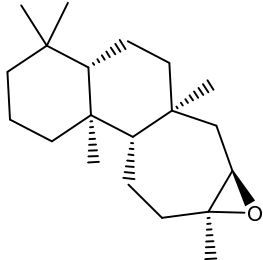   | -7.7 |
| 147 | Sarcophytolide 1 (32)                                       | <i>S. glaucum</i>       |    | -7.7 |
| 148 | Biflora-4,10(19),15-triene (106)                            | <i>X. obscuronata</i>   |    | -7.7 |
| 149 | Aikupikoxide C (142)                                        | <i>D. erythraeanus</i>  |   | -7.6 |
| 150 | (+)-7 $\alpha$ ,8 $\beta$ -Dihydroxydeepoxy-sarcophine (31) | <i>S. glaucum</i>       |  | -7.6 |
| 151 | Scalardysin (114)                                           | <i>Dysidea herbacea</i> |  | -7.6 |
| 152 | Avarol (19)                                                 | <i>Dysidea cinerea</i>  |  | -7.6 |

---

|     |                                                                |                          |                                                                                      |      |
|-----|----------------------------------------------------------------|--------------------------|--------------------------------------------------------------------------------------|------|
| 153 | Sarcophytolide C (68)                                          | <i>S. glaucum</i>        | 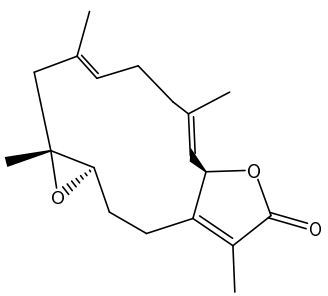   | -7.6 |
| 154 | Sclerophytin F methyl ether (94)                               | <i>C. pachyclados</i>    |    | -7.5 |
| 155 | 20-Acetylsinularolide B (59)                                   | <i>L. crassum</i>        |   | -7.5 |
| 156 | Pachycladin E (92)                                             | <i>C. pachyclados</i>    |  | -7.5 |
| 157 | (1R,2E,4S,6E,8R,11R,12R)-2,6-cembradiene-4,8,11,12-tetrol (71) | <i>S. auritum</i>        |  | -7.5 |
| 158 | Xeniaphyllenol-C (79)                                          | <i>X. macrosoiculata</i> |  | -7.5 |

---

159

Cembrene-A (51)

*Alcyonium  
utinomii*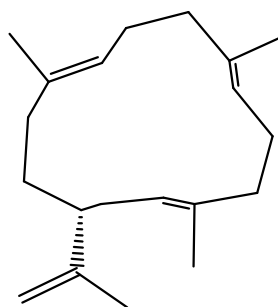

-7.5

160

Triterpene

*Clothraria  
rubrinoidis*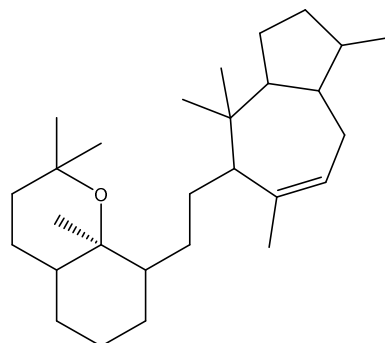

-7.5

161

Sinularolide C (61)

*L. crassum*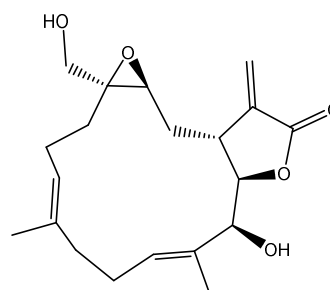

-7.5

162

Obscuronatin (105)

*Xenia obscuronata*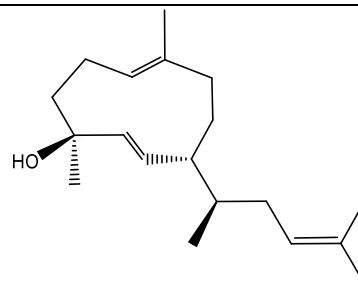

-7.4

163

Cladiellisin (88)

*C. pachyclados*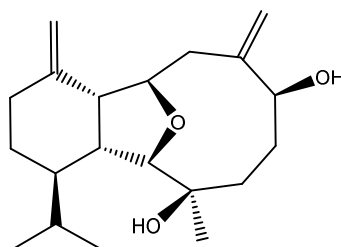

-7.4

---

|     |                              |                               |                                                                                      |      |
|-----|------------------------------|-------------------------------|--------------------------------------------------------------------------------------|------|
| 164 | Nephtenol (50)               | <i>Lobophytum pauciflorum</i> | 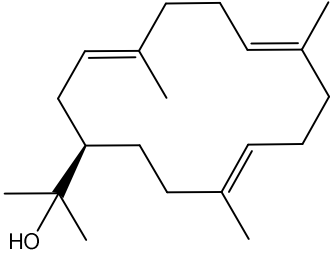   | -7.4 |
| 165 | Seco-norrrlandin C (113)     | <i>Dysidea sp.</i>            |    | -7.4 |
| 166 | 6'-Hydroxyavarol (24)        | <i>D.cinerea</i>              |   | -7.4 |
| 167 | Alcyonol C (54)              | <i>A. utinomii</i>            |  | -7.4 |
| 168 | Pauciflorol B (56)           | <i>L. pauciflorum</i>         |  | -7.4 |
| 169 | 20-Acetylsinularolide C (60) | <i>L. crassum</i>             |  | -7.4 |

---

---

|     |                                                                                                     |                           |                                                                                      |      |
|-----|-----------------------------------------------------------------------------------------------------|---------------------------|--------------------------------------------------------------------------------------|------|
| 170 | 3'-Hydroxyavarone ( <b>20</b> )                                                                     | <i>D.cinerea</i>          | 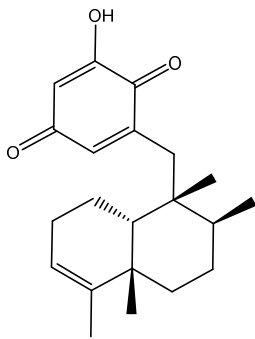   | -7.4 |
| 171 | 16-Oxosarcophytonin E ( <b>38</b> )                                                                 | <i>S. trocheliophorum</i> |    | -7.4 |
| 172 | Alcyonol A ( <b>52</b> )                                                                            | <i>A. utinomii</i>        |   | -7.3 |
| 173 | Gorgostan-3 $\beta$ ,5 $\alpha$ ,6 $\beta$ ,11 $\alpha$ -tetraol (sarcoaldosterol A) ( <b>180</b> ) | <i>H. ghardaqensis</i>    |  | -7.3 |
| 174 | Norrlandin ( <b>111</b> )                                                                           | <i>Dysidea sp.</i>        |  | -7.3 |

---

---

|     |                                                                        |                         |                                                                                      |      |
|-----|------------------------------------------------------------------------|-------------------------|--------------------------------------------------------------------------------------|------|
| 175 | 7 $\beta$ -Acetoxy-8 $\alpha$ -hydroxy-deepoxysarcophine ( <b>47</b> ) | <i>S. glaucum</i>       | 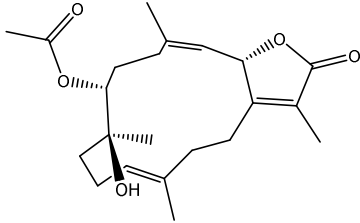   | -7.3 |
| 176 | Sclerophytin B ( <b>95</b> )                                           | <i>C. pachyclados</i>   |    | -7.3 |
| 177 | Ilimaquinone ( <b>18</b> )                                             | <i>Smenospongia sp.</i> |   | -7.3 |
| 178 | Alcyonol B ( <b>53</b> )                                               | <i>A. utinomii</i>      |  | -7.3 |
| 179 | Sarcophytolide B ( <b>67</b> )                                         | <i>S. glaucum</i>       |  | -7.3 |
| 180 | 2-epi-Sarcophine ( <b>70</b> )                                         | <i>S. auritum</i>       |  | -7.3 |

---

---

|     |                                                  |                            |                                                                                      |      |
|-----|--------------------------------------------------|----------------------------|--------------------------------------------------------------------------------------|------|
| 181 | Aikupikoxide A (140)                             | <i>D. erythraeanus</i>     | 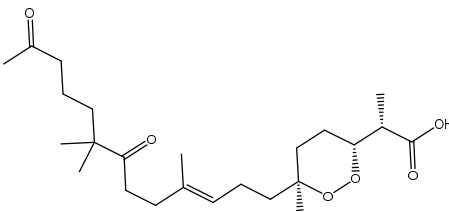   | -7.2 |
| 182 | Pachycladin C (87)                               | <i>C. pachyclados</i>      |    | -7.2 |
| 183 | Ylangene                                         | <i>Sarcophyton glaucum</i> |    | -7.2 |
| 184 | 3-Deoxypresinularolide B (63)                    | <i>L. crassum</i>          |   | -7.2 |
| 185 | 8-epi-Sarcophinone (40)                          | <i>S. trocheliophorum</i>  |  | -7.2 |
| 186 | (1S,2E,4R,7E,11E,13S)-Cembratrien-4,13-diol (33) | <i>S. glaucum</i>          |  | -7.1 |

---



|     |                                                                     |                            |                                                                                      |      |
|-----|---------------------------------------------------------------------|----------------------------|--------------------------------------------------------------------------------------|------|
| 187 | Alismol (5)                                                         | <i>Litophyton arboreum</i> | 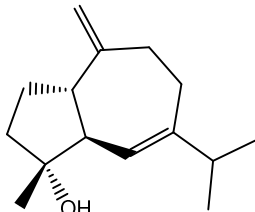   | -7.1 |
| 188 | (2R,7R,8R)-Dihydroxy-deepoxysarcophine (46)                         | <i>S. glaucum</i>          |    | -7.1 |
| 189 | 10-O-Methyl alismoxide (7)                                          | <i>L. arboreum</i>         |    | -7.1 |
| 190 | 12(S)-Hydroperoxylsarcoph-10-ene (45)                               | <i>S. glaucum</i>          |  | -7.1 |
| 191 | (1S,2E,4R,6E,8S,11R,12S)-8,11-Epoxy-4,12-epoxy-2,6-cembradiene (35) | <i>S. glaucum</i>          |  | -7.1 |
| 192 | 3-Acetyl Cladiellisin (89)                                          | <i>C. pachyclados</i>      |  | -7.1 |

---

|     |                                                                            |                                        |                                                                                      |      |
|-----|----------------------------------------------------------------------------|----------------------------------------|--------------------------------------------------------------------------------------|------|
| 193 | (1S,2E,4R,6E,8R,11S,12R)-<br>8,12-Epoxy-2,6-<br>cembradiene-4,11-diol (34) | <i>S. glaucum</i>                      | 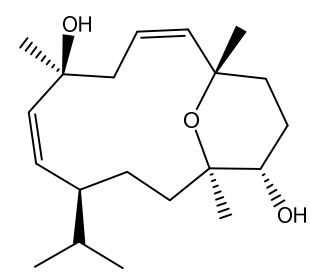   | -7.1 |
| 194 | Cembrene C (29)                                                            | <i>Sarcophyton<br/>trocheliophorum</i> |    | -7.1 |
| 195 | Singardin (72)                                                             | <i>Sinularia<br/>gardineri</i>         |   | -7.1 |
| 196 | Aromadendrane (B)                                                          | <i>S. regulare</i>                     |  | -7.1 |
| 197 | Xenialactol-D (74)                                                         | <i>X. obscuronata</i>                  |  | -7.1 |

---

198 3',6'-Dihydroxyavarone (21)

*D.cinerea*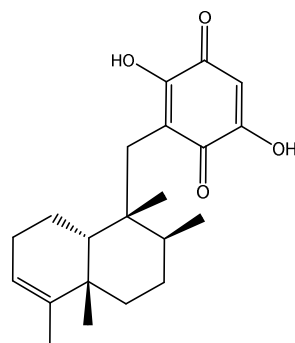

-7.1

199 Deoxosarcophine (69)

*S. glaucum*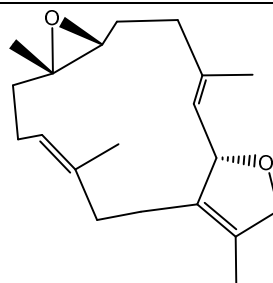

-7.1

200 Dendronephthol A (1)

*Nephtheidae*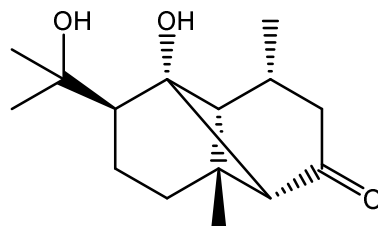

-7.1

201 6'-Acetoxyavarone (22)

*D.cinerea*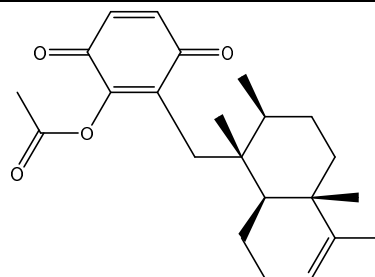

-6.9

202 Hyrtiosenolide A (13)

*sponge Hyrtios sp.*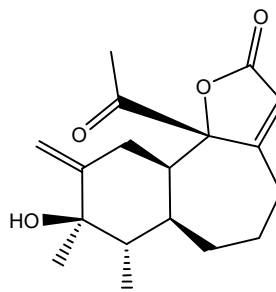

-6.9

203 Cladiella-6Z,11(17)-dien-3-ol (97)

*C. pachyclados*

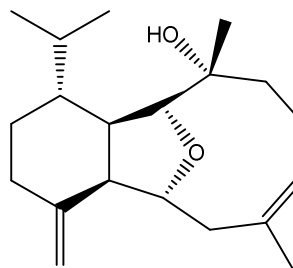

-6.9

204 3,6-Diacetyl Cladiellisin (90)

*C. pachyclados*

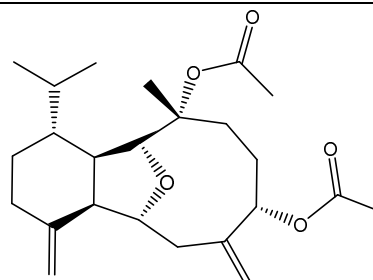

-6.8

205 Guaianediol (4)

*Sinularia gardineri*

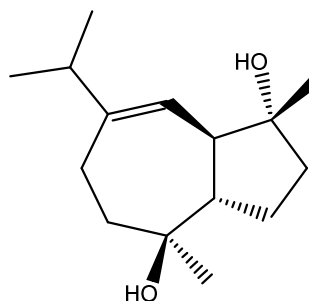

-6.8

206 ent-Sarcophine (39)

*S. trocheliophorum*

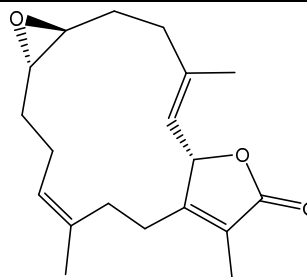

-6.8

207 Durumolide C (43)

*Sinularia polydactyla*

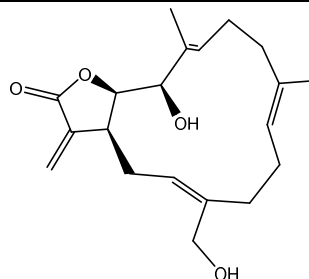

-6.8

208 Pauciflorol A (55)

*L. pauciflorum*

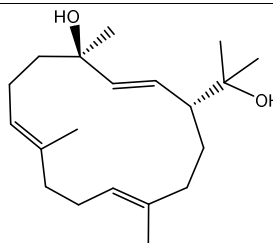

-6.8

209 Alismoxide (8)

*L. arboreum*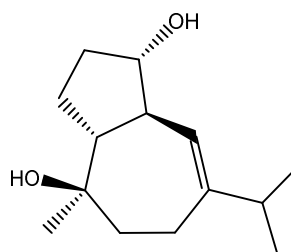

-6.8

210 Xeniaphyllene-dioxide (78)

*X. lilielae*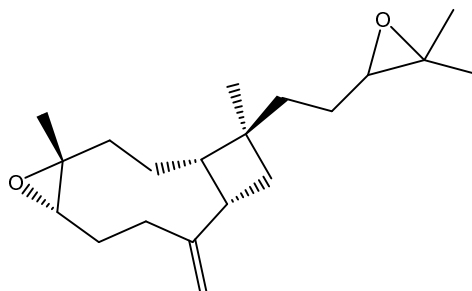

-6.7

211 Juncins B (100)

*J. juncea*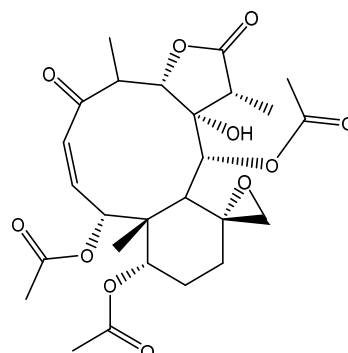

-6.7

212 Palustrol (9)

*Sarcophyton  
trocheliophorum*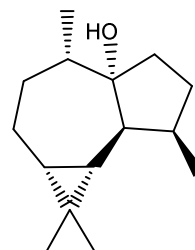

-6.7

213 Lactiflorenol (6)

*Sinularia  
polydactyla*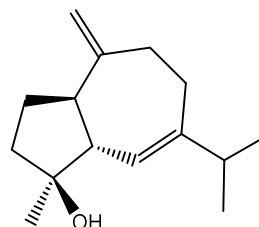

-6.7

214 Sarcotrocheliol acetate (41) *S. trocheliophorum*

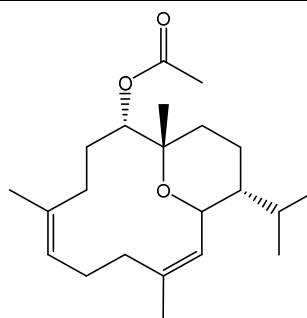

-6.6

215 5-Hydroxy-8-methoxy-calamenene (15) *Parerythropodium fulvum fulvum*

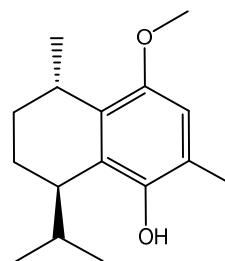

-6.6

216 10(14)-Aromadendrene (10)

*Sarcophyton glaucum*

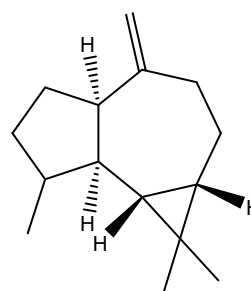

-6.6

217 Dactyltronic acids (27) *Smenospongia sp.*

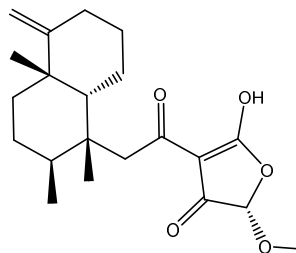

-6.6

218 Dendronephthol C (3)

*Nephtheidae*

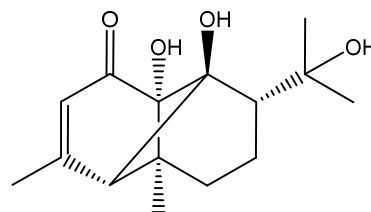

-6.4

219

Juncins (104)

*J. juncea*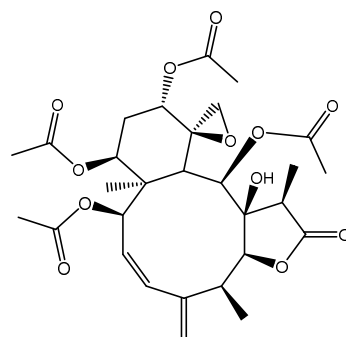

-6.4

220

6'-Acetoxyavarol (25)

*D. cinerea*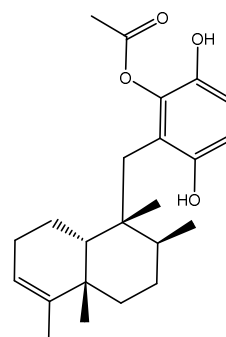

-6.4

221

5-Hydroxy-8-methoxy-calamenene-6-al (16)

*Parerythropodium fulvum fulvum*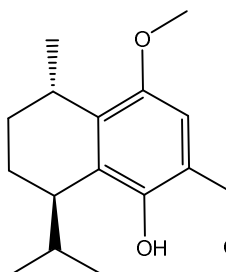

-6.4

222

Erylosides L (225)

*E. lendenfeldi*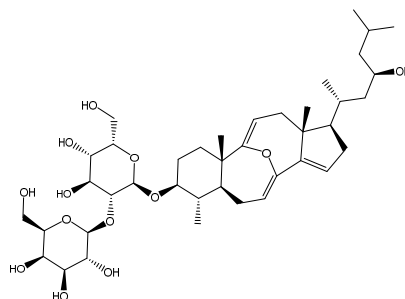

-6.4

223

Sarcophytolol (66)

*Sarcophyton glaucum*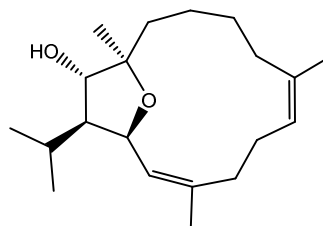

-6.3

224

Fulfulvene (11)

*Parerythropodium  
fulvum fulvum*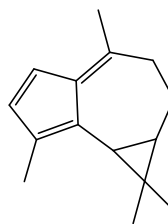

-6.2

225

Dendronephthol B (2)

*Nepththeidae*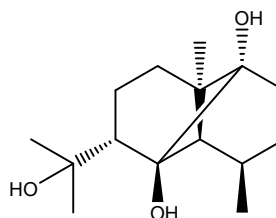

-6.2

226

Aikupikoxide D (141)

*D. erythraeanus*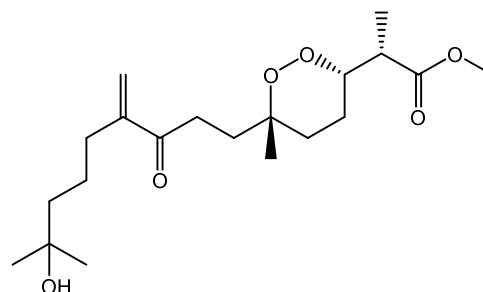

-5.5

227

Briarein A (98)

*Junceella juncea*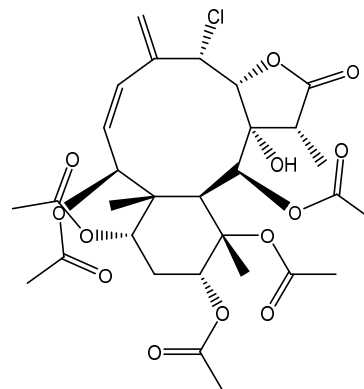

-4.6

228

Juncins C (101)

*J. juncea*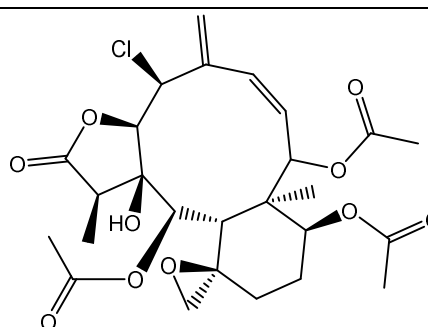

-4.3



**Table S2.** Computed Autodock and MM/GBSA binding energies (in kcal/mol) for the top 27 potent marine natural products (MNPs) against SARS-CoV-2 main protease (M<sup>Pro</sup>) over 250 ps implicit solvent MD simulations<sup>a</sup>.

| No. | Compound Name                                                                                                     | Autodock<br>Binding Score<br>(kcal/mol) | MM/GBSA<br>Binding Energy<br>(kcal/mol) |
|-----|-------------------------------------------------------------------------------------------------------------------|-----------------------------------------|-----------------------------------------|
| 1   | Lopinavir                                                                                                         | -9.8                                    | -39.4                                   |
| 2   | Erylosides B (226)                                                                                                | -12.1                                   | -50.8                                   |
| 3   | Erylosides K (224)                                                                                                | -11.1                                   | -50.4                                   |
| 4   | 3 $\beta$ -Hexadecanoylcholest-5-en-7-one (202)                                                                   | -10.0                                   | -49.3                                   |
| 5   | Eryloside A (197)                                                                                                 | -10.7                                   | -47.8                                   |
| 6   | SipholenolA-4-O-3',4'-dichlorobenzoate (151)                                                                      | -10.5                                   | -42.6                                   |
| 7   | Sipholenone E (163)                                                                                               | -9.9                                    | -40.9                                   |
| 8   | Sipholenone A (175)                                                                                               | -11.0                                   | -37.7                                   |
| 9   | 3 $\beta$ -25-Dihydroxy-4-methyl-5 $\alpha$ ,8 $\alpha$ -epidioxy-2-ketoergost-9-ene (178)                        | -12.2                                   | -36.1                                   |
| 10  | Sipholenol D (176)                                                                                                | -11.0                                   | -35.9                                   |
| 11  | (22R,24E,28E)-5 $\beta$ ,6 $\beta$ -Epoxy-22,28-oxido-24-methyl-5 $\alpha$ cholestan-3 $\beta$ ,25,28-triol (191) | -11.4                                   | -35.2                                   |
| 12  | Sipholenol I (174)                                                                                                | -11.8                                   | -35.1                                   |
| 13  | Sipholenol H (157)                                                                                                | -12.0                                   | -34.7                                   |
| 14  | Sipholenone D (155)                                                                                               | -10.7                                   | -33.4                                   |
| 15  | Siphonellinol C (172)                                                                                             | -11.3                                   | -33.0                                   |
| 16  | Neviotine B (158)                                                                                                 | -10.9                                   | -32.2                                   |
| 17  | Tasnemoxide A (144)                                                                                               | -11.4                                   | -32.2                                   |
| 18  | Siphonellinol-C-23-hydroperoxide (171)                                                                            | -11.2                                   | -31.8                                   |
| 19  | Brassicasterol (222)                                                                                              | -10.1                                   | -31.4                                   |
| 20  | Cholest-5-en-3 $\beta$ ,7 $\beta$ -diol (206)                                                                     | -10.3                                   | -31.1                                   |
| 21  | Dahabinone A (162)                                                                                                | -11.9                                   | -30.2                                   |
| 22  | Clionasterol (219)                                                                                                | -10.3                                   | -29.9                                   |
| 23  | Depresosterol (190)                                                                                               | -12.3                                   | -28.1                                   |
| 24  | Campesterol (221)                                                                                                 | -10.3                                   | -27.8                                   |
| 25  | Cholesterol (184)                                                                                                 | -10.3                                   | -27.4                                   |
| 26  | Lobophytosterol (188)                                                                                             | -11.5                                   | -27.4                                   |
| 27  | 24-Methylcholestane-5-en-3 $\beta$ ,25-diol (187)                                                                 | -10.6                                   | -27.3                                   |
| 28  | Stigmasterol (220)                                                                                                | -10.5                                   | -26.4                                   |

<sup>a</sup>Data sorted according to the calculated MM/GBSA binding energies.

**Table S3.** Network topological analysis for the predicted targets for erylosides B (226).

| Name   | BetweennessCentrality | ClosenessCentrality | Degree | Number Of Undirected Edges |
|--------|-----------------------|---------------------|--------|----------------------------|
| VEGFA  | 0.16167593622379026   | 0.543859649122807   | 30     | 30                         |
| DRD2   | 0.09010641139487129   | 0.4946808510638298  | 27     | 27                         |
| STAT3  | 0.08946266709776997   | 0.5166666666666666  | 24     | 24                         |
| JUN    | 0.0981884572759623    | 0.510989010989011   | 23     | 23                         |
| ADRA2A | 0.024166127699934013  | 0.45365853658536587 | 23     | 23                         |
| ADRA2C | 0.017619738652461147  | 0.44285714285714284 | 22     | 22                         |
| F2     | 0.06340725344246699   | 0.4696969696969697  | 21     | 21                         |
| ADRA2B | 0.016564892030468053  | 0.4407582938388625  | 21     | 21                         |
| SLC6A3 | 0.02851326445210035   | 0.44497607655502397 | 20     | 20                         |
| ADRA1A | 0.008093604972074064  | 0.41150442477876104 | 19     | 19                         |
| ADRA1B | 0.013961744615366147  | 0.4246575342465753  | 19     | 19                         |
| REN    | 0.060652471264093046  | 0.484375            | 19     | 19                         |
| PRKCA  | 0.06205750483643582   | 0.48186528497409326 | 18     | 18                         |
| DRD3   | 0.008419520597214505  | 0.43457943925233644 | 18     | 18                         |
| OPRK1  | 0.019575984856832866  | 0.42081447963800905 | 18     | 18                         |
| ADRA1D | 0.005035012045256654  | 0.40611353711790393 | 18     | 18                         |
| EDNRB  | 0.040084345951539736  | 0.44497607655502397 | 18     | 18                         |
| IL2    | 0.0567559135447914    | 0.47692307692307695 | 17     | 17                         |
| HTR2A  | 0.006128365201270778  | 0.4096916299559471  | 17     | 17                         |
| FGF2   | 0.023107182275248352  | 0.484375            | 16     | 16                         |
| PRKCB  | 0.030044228440275655  | 0.4696969696969697  | 16     | 16                         |
| HTR2C  | 0.004745649753776972  | 0.40086206896551724 | 16     | 16                         |
| SLC6A2 | 0.012665535612403297  | 0.39914163090128757 | 16     | 16                         |
| ACHE   | 0.017816808762018056  | 0.4133333333333333  | 16     | 16                         |

**Table S4.** Top 20 most relevant pathways for erylosides B (226) targets resulted from Pathway Enrichment Analysis (PEA). PEA was performed using a binomial test and p-values were False Discovery Rate (FDR)-corrected for multiple testing.

| Pathway name                                                       | Entities found | Entities total | Interactors found | Interactors total | Entities ratio | Entities pValue | Entities FDR | Reactions found | Reactions total | Reactions ratio |
|--------------------------------------------------------------------|----------------|----------------|-------------------|-------------------|----------------|-----------------|--------------|-----------------|-----------------|-----------------|
| Signaling by GPCR                                                  | 15             | 1497           | 9                 | 1666              | 0.1016         | 0.00157934      | 0.0728       | 45              | 445             | 0.03363822      |
| GPCR downstream signalling                                         | 14             | 1355           | 3                 | 1157              | 0.092          | 5.72E-04        | 0.0353       | 31              | 260             | 0.01965379      |
| GPCR ligand binding                                                | 13             | 665            | 6                 | 581               | 0.0451         | 1.10E-06        | 1.48E-04     | 14              | 185             | 0.01398443      |
| Class A/1 (Rhodopsin-like receptors)                               | 13             | 475            | 6                 | 552               | 0.03226        | 1.21E-07        | 2.69E-05     | 14              | 158             | 0.01194346      |
| Amine ligand-binding receptors                                     | 10             | 88             | 4                 | 50                | 0.0059         | 3.39E-13        | 2.27E-10     | 6               | 22              | 0.00166301      |
| G alpha (q) signalling events                                      | 8              | 283            | 3                 | 461               | 0.0192         | 1.70E-04        | 0.0161       | 7               | 35              | 0.0026457       |
| Platelet activation, signaling and aggregation                     | 8              | 296            | 2                 | 669               | 0.0201         | 7.93E-04        | 0.0436       | 15              | 115             | 0.00869302      |
| Adrenoceptors                                                      | 6              | 48             | 1                 | 35                | 0.0032         | 2.97E-08        | 9.94E-06     | 3               | 7               | 5.29E-04        |
| G alpha (z) signalling events                                      | 5              | 62             | 0                 | 48                | 0.0042         | 4.02E-06        | 4.46E-04     | 6               | 13              | 9.83E-04        |
| Interleukin-4 and Interleukin-13 signaling                         | 5              | 216            | 1                 | 153               | 0.0146         | 0.00110401      | 0.0563       | 21              | 47              | 0.0035528       |
| POU5F1 (OCT4), SOX2, NANOG activate genes related to proliferation | 4              | 21             | 2                 | 132               | 0.0014         | 3.29E-04        | 0.0273       | 4               | 16              | 0.00120946      |
| Response to elevated platelet cytosolic Ca <sup>2+</sup>           | 4              | 144            | 0                 | 104               | 0.0097         | 0.00206465      | 0.0802       | 4               | 14              | 0.00105828      |
| Transcriptional regulation of pluripotent stem cells               | 4              | 45             | 2                 | 231               | 0.003          | 0.00300441      | 0.1051       | 6               | 35              | 0.0026457       |

|                                                                                 |   |    |   |     |          |            |          |   |    |            |
|---------------------------------------------------------------------------------|---|----|---|-----|----------|------------|----------|---|----|------------|
| Platelet<br>Aggregation<br>(Plug Formation)                                     | 4 | 53 | 1 | 315 | 0.0036   | 0.00778789 | 0.1999   | 4 | 27 | 0.00204097 |
| Adrenaline<br>signalling<br>through Alpha-2<br>adrenergic<br>receptor           | 3 | 5  | 0 | 0   | 3.40E-04 | 2.05E-07   | 3.42E-05 | 1 | 1  | 7.56E-05   |
| G alpha (12/13)<br>signalling events                                            | 3 | 87 | 0 | 63  | 0.0059   | 0.00402801 | 0.1329   | 3 | 15 | 0.00113387 |
| VEGFR2<br>mediated cell<br>proliferation                                        | 3 | 31 | 0 | 132 | 0.0021   | 0.00556703 | 0.1725   | 7 | 12 | 9.07E-04   |
| Dopamine<br>receptors                                                           | 2 | 6  | 3 | 9   | 4.08E-04 | 4.53E-04   | 0.0335   | 2 | 3  | 2.27E-04   |
| Depolymerisation<br>of the Nuclear<br>Lamina                                    | 2 | 23 | 0 | 8   | 0.0015   | 0.00216767 | 0.0802   | 2 | 6  | 4.54E-04   |
| RUNX1 and<br>FOXP3 control<br>the development<br>of regulatory T<br>lymphocytes | 2 | 17 | 2 | 39  | 0.0011   | 0.00637006 | 0.1771   | 6 | 20 | 0.00151183 |
